# Supplementary material for: How often will midwives and obstetricians experience obstetric emergencies or high-risk deliveries: a national cross-sectional study
Source: PubMed Central journal article supplement — BMJ Open. 2021 Nov 10;11(11):e050790. doi: 10.1136/bmjopen-2021-050790 (PMC8587359; doi:10.1136/bmjopen-2021-050790), 2021-11-10
Supplement: bmjopen-2021-050790.draft_revisions.pdf [file bmjopen-2021-050790.draft_revisions.pdf]

# BMJ Open

BMJ Open is committed to open peer review. As part of this commitment we make the peer review history of every article we publish publicly available.

When an article is published we post the peer reviewers' comments and the authors' responses online. We also post the versions of the paper that were used during peer review. These are the versions that the peer review comments apply to.

The versions of the paper that follow are the versions that were submitted during the peer review process. They are not the versions of record or the final published versions. They should not be cited or distributed as the published version of this manuscript.

BMJ Open is an open access journal and the full, final, typeset and author-corrected version of record of the manuscript is available on our site with no access controls, subscription charges or pay-per-view fees (<http://bmjopen.bmj.com>).

If you have any questions on BMJ Open's open peer review process please email [info.bmjopen@bmj.com](mailto:info.bmjopen@bmj.com)

# BMJ Open

## How often will midwives and obstetricians experience obstetric emergencies or high-risk deliveries: a national cross-sectional study

|                               |                                                                                                                                                                                                                                                                                                                                                                                                                                                                                                                                     |
|-------------------------------|-------------------------------------------------------------------------------------------------------------------------------------------------------------------------------------------------------------------------------------------------------------------------------------------------------------------------------------------------------------------------------------------------------------------------------------------------------------------------------------------------------------------------------------|
| Journal:                      | <i>BMJ Open</i>                                                                                                                                                                                                                                                                                                                                                                                                                                                                                                                     |
| Manuscript ID                 | bmjopen-2021-050790                                                                                                                                                                                                                                                                                                                                                                                                                                                                                                                 |
| Article Type:                 | Original research                                                                                                                                                                                                                                                                                                                                                                                                                                                                                                                   |
| Date Submitted by the Author: | 06-Mar-2021                                                                                                                                                                                                                                                                                                                                                                                                                                                                                                                         |
| Complete List of Authors:     | Høgh, Stinne; Rigshospitalet, Department of Obstetrics Thellessen, Line; Rigshospitalet University Hospital Bergholt, Thomas; Rigshospitalet, Dept. of Obstetrics and Gynecology Rom, Ane; Rigshospitalet, University of Copenhagen, Juliane Marie Centre for Children, Women and reproduction section 4074 Johansen, Marianne; Rigshospitalet, Department of obstetrics Sorensen, Jette Led; Rigshospitalet, University of Copenhagen, Juliane Marie Centre for Children, Women and reproduction section 4074; Jette Led Sorensen, |
| Keywords:                     | OBSTETRICS, MEDICAL EDUCATION & TRAINING, ACCIDENT & EMERGENCY MEDICINE                                                                                                                                                                                                                                                                                                                                                                                                                                                             |
|                               |                                                                                                                                                                                                                                                                                                                                                                                                                                                                                                                                     |

SCHOLARONE™  
Manuscripts

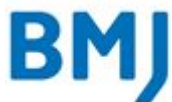

I, the Submitting Author has the right to grant and does grant on behalf of all authors of the Work (as defined in the below author licence), an exclusive licence and/or a non-exclusive licence for contributions from authors who are: i) UK Crown employees; ii) where BMJ has agreed a CC-BY licence shall apply, and/or iii) in accordance with the terms applicable for US Federal Government officers or employees acting as part of their official duties; on a worldwide, perpetual, irrevocable, royalty-free basis to BMJ Publishing Group Ltd ("BMJ") its licensees and where the relevant Journal is co-owned by BMJ to the co-owners of the Journal, to publish the Work in this journal and any other BMJ products and to exploit all rights, as set out in our [licence](#).

The Submitting Author accepts and understands that any supply made under these terms is made by BMJ to the Submitting Author unless you are acting as an employee on behalf of your employer or a postgraduate student of an affiliated institution which is paying any applicable article publishing charge ("APC") for Open Access articles. Where the Submitting Author wishes to make the Work available on an Open Access basis (and intends to pay the relevant APC), the terms of reuse of such Open Access shall be governed by a Creative Commons licence – details of these licences and which [Creative Commons](#) licence will apply to this Work are set out in our licence referred to above.

Other than as permitted in any relevant BMJ Author's Self Archiving Policies, I confirm this Work has not been accepted for publication elsewhere, is not being considered for publication elsewhere and does not duplicate material already published. I confirm all authors consent to publication of this Work and authorise the granting of this licence.

1  
2  
3  
4 1 **How often will midwives and obstetricians experience obstetric emergencies or high-risk**  
5  
6 2 **deliveries: a national cross-sectional study**  
7  
8

9 3

10  
11 4 **Authors**  
12

13 5 Stinne Høgh<sup>1</sup>, Line Thellesen<sup>1</sup>, Thomas Bergholt<sup>1,2</sup>, Ane Lilleøre Rom<sup>1</sup>, Marianne Johansen<sup>1</sup> & Jette  
14  
15 6 Led Sørensen<sup>1,2</sup>  
16  
17

18 7

19  
20 8 **Author affiliations and addresses**  
21

22 9 <sup>1</sup>Department of Obstetrics, Juliane Marie Centre, Rigshospitalet, University of Copenhagen,  
23  
24 Blegdamsvej 9, 2100 Copenhagen, Denmark  
25 10

26  
27 11 <sup>2</sup>Department of Clinical Medicine, University of Copenhagen, Blegdamsvej 3B, 2200 Copenhagen,  
28  
29 12 Denmark  
30  
31

32 13

33  
34 14 **Corresponding author**  
35

36 15 Stinne Høgh  
37

38  
39 16 Department of Obstetrics, Juliane Marie Centre, Rigshospitalet University Hospital, University of  
40  
41 17 Copenhagen, Blegdamsvej 9, 2100 Copenhagen, Denmark  
42

43 18 Tel: +45 22973556  
44

45 19 Email address: [stinne.hoegh@regionh.dk](mailto:stinne.hoegh@regionh.dk)  
46  
47

48 20

49  
50 21 **Running title**  
52

53 22 Obtaining skills in managing obstetric emergencies  
54  
55  
56  
57  
58  
59  
60

## 23 **Abstract**

### 24 **Objective**

25 To estimate how often midwives, specialty trainees, and doctors specialised in obstetrics and  
26 gynaecology are attending to specific obstetric emergencies or high-risk deliveries (obstetric events).

### 27 **Design**

28 A national cross-sectional study.

### 29 **Setting**

30 All hospital labour wards in Denmark.

### 31 **Participants**

32 Midwives (n=1300), specialty trainees (n=180), and doctors specialised in obstetrics and gynaecology  
33 (n=340) working in hospital labour wards (n=21) in Denmark in 2018.

### 34 **Methods**

35 Categories of obstetric events comprised of Apgar score  $<7/5$  min, eclampsia, emergency caesarean  
36 sections, severe postpartum haemorrhage, shoulder dystocia, umbilical cord prolapse, vaginal breech  
37 deliveries, vaginal twin deliveries, and vacuum extraction. Data on number of healthcare  
38 professionals were obtained through the Danish maternity wards, the Danish Health Authority and  
39 the Danish Society of Obstetricians and Gynaecologists. We calculated the time interval between  
40 attending each obstetric event by dividing the number of events occurred with the number of  
41 healthcare professionals.

### 42 **Outcome measures**

43 The time interval between attending a specific obstetric event.

### 44 **Results**

45 The average time between experiencing obstetric events was from nine days to 42 years. Emergency  
46 caesarean sections, which occur relatively frequent, were attended on average every other month by

1  
2  
3  
4 47 midwives, every nine days for specialty trainees, and every 17 days by specialist doctors. On average,  
5  
6 48 rare events like eclampsia were experienced by midwives only every 42 years, every six years by  
7  
8  
9 49 specialty trainees, and every 11 years by specialist doctors.

## 11 50 **Conclusions**

12  
13 51 Some obstetric events occur extremely rarely, hindering the ability to obtain and maintain the clinical  
14  
15 52 skills to manage them through clinical practice alone. By assessing the frequency of a healthcare  
16  
17 53 professionals attending an obstetric emergency our study contributes to assessing the need for  
18  
19 54 supplementary educational initiatives and interventions to learn and maintain clinical skills.  
20  
21  
22  
23 55

## 25 56 **Strengths and limitations of this study**

- 27 57 • The first study to calculate how often healthcare professionals can expect to attend specific  
28  
29 58 obstetric emergencies or high-risk deliveries in clinical real life.
- 31  
32 59 • The incidence of the obstetric events was based on a large data source comprising 465,919  
33  
34 60 deliveries.
- 35  
36 61 • Even though the number of healthcare professionals working in labour wards are constantly  
37  
38 62 changing, our study results are assumed to be the most valid estimates obtainable as minor  
39  
40 63 variations in the number of healthcare professionals do not change the estimates substantially.  
41  
42  
43  
44 64

## 48 65 **Keywords**

49  
50 66 Obstetrics, pregnancy outcome, obstetric emergencies, obstetric nursing/education, emergency  
51  
52 67 treatment  
53  
54  
55

## 57 68 **Disclosure of interest**

58  
59 69 The authors have no conflicts of interests to disclose.  
60

## 71 **Introduction**

72 In high-income countries most pregnancies have good outcomes. Obstetric emergencies like  
73 eclampsia, severe postpartum haemorrhage, shoulder dystocia, and umbilical cord prolapse are  
74 fortunately rare obstetric events.<sup>1</sup> These potentially life threatening emergencies often occur  
75 unexpectedly, and require immediate action by healthcare professionals<sup>2, 3</sup> and may entail tragic  
76 consequences such as death or serious morbidity in women and/or newborns.<sup>4-6</sup>

77 Obstetric emergencies often occur in extremely stressful settings that require highly professional  
78 communication and teamwork skills in order to take appropriate action. Similarly, high-risk deliveries,  
79 like vaginal twin or breech deliveries, also require highly specialised skills in healthcare professionals  
80 attending the event to ensure good outcomes.<sup>7-10</sup>

81 Healthcare professionals must be qualified to manage these emergencies and high-risk deliveries  
82 (obstetric events) to ensure patient safety. However, audit based studies have shown how these events  
83 are not always managed according to well-known, evidence-based standards of obstetric care.<sup>5, 6, 11-</sup>

84 <sup>15</sup> An analysis of 127 cases of peripartum hypoxic brain injuries in claims registered by the Danish  
85 Patient Insurance Association concluded that all of the injuries were potentially avoidable if standard  
86 obstetric care had been applied.<sup>11</sup> Substandard care was also found in 42% of deliveries with low  
87 Apgar scores in Sweden,<sup>12</sup> and in the United Kingdom in nearly half of intrapartum stillbirths and in  
88 half of the intrapartum-related neonatal deaths.<sup>13</sup> Studies of maternal deaths in the United Kingdom  
89 found that substandard care during pregnancy or delivery had occurred in 29% of cases.<sup>16</sup>

90 Clinical negligence is devastating to the family involved, just as the healthcare professionals involved  
91 may experience emotional, behavioural, and cognitive consequences in terms of anxiety, depression  
92 symptoms,<sup>17</sup> post-traumatic stress disorder,<sup>18</sup> and loss of professional confidence, leading to self-  
93 doubt, isolation, practicing defensive medicine, and fear.<sup>19, 20</sup> Healthcare professionals involved in  
94 cases of clinical negligence are often referred to as second victims.<sup>17, 18, 21</sup> Moreover, cases of clinical

1  
2  
3  
4 95 negligence often entail high litigation and future healthcare costs.<sup>22, 23</sup> Hence, to safeguard the women  
5  
6 96 and prevent avoidable harm due to substandard obstetric care, and subsequent litigation and  
7  
8  
9 97 healthcare costs, the level of quality of managing obstetric events must be improved. The low  
10  
11 98 incidence rate of certain obstetric events, however, challenge healthcare professionals' opportunities  
12  
13  
14 99 to obtain and maintain the necessary clinical skills through daily clinical practice alone is a well-  
15  
16 100 known issue that needs addressing. However, no study has previously quantified this challenge.  
17

18 101  
19  
20 102 To gauge the average number of opportunities, healthcare professionals have to obtain and maintain  
21  
22  
23 103 their proficiency in managing obstetric events, this study aimed to estimate how often midwives,  
24  
25 104 specialty trainees, and doctors specialised in obstetrics and gynaecology can expect to attend to and  
26  
27 105 get involved in obstetric emergencies and high-risk deliveries.  
28

## 31 32 107 **Methods**

### 33 34 35 108 **Study design and setting**

36  
37 109 We conducted a national cross-sectional study that included midwives, specialty trainees, and doctors  
38  
39 110 specialised in obstetrics and gynaecology (specialist doctors) working clinically in hospital-based  
40  
41  
42 111 labour wards in Denmark in 2018. There are approximately 60,000 deliveries in Denmark annually,  
43  
44 112 with 96-98% occurring at public hospitals and 2-3% as home births.<sup>24</sup>  
45

46 113 In 2018 Denmark had 21 labour wards, all of them staffed with in-house, on-call specialist doctors in  
47  
48 114 obstetrics and gynaecology as well as anaesthesiology specialist doctors. The wards vary in size and  
49  
50  
51 115 specialty level from highly specialised tertiary referral centres (the largest with about 7000 deliveries  
52  
53 116 per year) to small departments with only 600–1000 deliveries per year. All low-risk deliveries are  
54  
55 117 attended by midwives often accompanied by midwifery students, during the active phase of labour.  
56  
57  
58 118 Specialist doctors and specialty trainees are only involved when complications arise.<sup>25</sup> In high-risk  
59  
60



1  
2  
3  
4 119 deliveries, specialist doctors and specialty trainees are always involved, and managing the delivery  
5  
6  
7 120 is a collaborative team effort between the midwife, specialty trainee, and specialist doctor.  
8

9 121

10

## 11 122 **Population**

12

### 13 123 **Eligible for inclusion**

14

15  
16 124 Midwives, specialty trainees, and specialist doctors in obstetrics and gynaecology working clinically  
17  
18 125 in a Danish labour ward in 2018 were eligible.  
19

20

21 126

22

#### 23 127 *Midwives*

24

25 128 In Denmark midwives must earn a bachelor's degree in midwifery. During the 3.5-year programme  
26  
27 129 students spend half of their time in clinical placements, e.g. midwifery centres, labour wards,  
28  
29  
30 130 antenatal wards and postnatal wards. Most midwives work in shifts. When caring for women giving  
31  
32 131 birth, midwives are qualified and authorised to work independently, though in collaboration with a  
33  
34 132 doctor when complications arise. This study collected data on midwives working predominantly on  
35  
36 133 labour wards. All the midwives were included as if they were working full-time.  
37

38

39 134

40

#### 41 135 *Specialty trainees*

42

43 136 In this study, specialty trainee refers to doctors in their five-year postgraduate medical specialist  
44  
45  
46 137 training programme in obstetrics and gynaecology. Mandatory general courses, specialty-specific  
47  
48 138 courses, and research training are also part of the curriculum. Upon graduation they are qualified to  
49  
50 139 examine and treat 90% of the conditions in the specialty.<sup>26</sup>  
51

52

53 140

54

#### 55 141 *Specialist doctors*

56

57

58

59

60

1  
2  
3  
4 142 In this study specialist doctors refers to individuals who have completed their specialty training in  
5  
6 143 obstetrics and gynaecology. A relatively large proportion of specialist doctors are subspecialised in  
7  
8  
9 144 either obstetrics or gynaecology, however with both groups participating in night shifts on the labour  
10  
11 145 wards. Specialist doctors on call have full responsibility for the labour ward and supervise specialty  
12  
13 146 trainees. According to the Danish Health Association labour wards must, as a minimum, always have  
14  
15  
16 147 a specialist doctor or a last year specialty trainee on duty. We included only specialist doctors,  
17  
18 148 working in hospitals, who also did night shifts on the labour wards.  
19

20 149  
21  
22  
23 150 The average work week for full-time healthcare professionals is 37 hours in Denmark. All healthcare  
24  
25 151 professionals included in this study participated in obstetric night shifts.  
26

## 27 152 28 29 153 **Data collection**

### 30 154 **Healthcare professionals**

31  
32 155 Data on the number of obstetric healthcare professionals were collected in 2018 to obtain more valid  
33  
34 156 data than would be possible had data been collected for previous years. Data on healthcare  
35  
36 157 professionals were retrieved in various ways.  
37  
38  
39  
40

### 41 158 42 43 159 *Midwives*

44  
45 160 The heads of midwifery in maternity units across Denmark were contacted by email in October 2018  
46  
47  
48 161 and asked to provide data on the number of midwives employed in their labour wards.  
49

### 50 162 51 52 163 *Specialty trainees*

53  
54 164 Data on the number of specialty trainees was obtained through the Danish Health Authority, which  
55  
56  
57 165 regulates the number of specialty trainees.<sup>27, 28</sup>  
58  
59  
60

1  
2  
3  
4  
5  
6  
7  
8  
9  
10  
11  
12  
13  
14  
15  
16  
17  
18  
19  
20  
21  
22  
23  
24  
25  
26  
27  
28  
29  
30  
31  
32  
33  
34  
35  
36  
37  
38  
39  
40  
41  
42  
43  
44  
45  
46  
47  
48  
49  
50  
51  
52  
53  
54  
55  
56  
57  
58  
59  
60

166

### 167 *Specialist doctors*

168 The Danish Society of Obstetricians and Gynaecologists furnished data on the number of specialist  
169 doctors.

170

171 The data on the number of healthcare professionals working in labour wards were validated with data  
172 from a national quality assurance project called Safe Deliveries.<sup>29</sup>

173

### 174 **Obstetric events**

175 In this study the term obstetric events refers to both obstetric emergencies and high-risk deliveries,  
176 the former defined as serious, unexpected, and potentially life-threatening conditions that may occur  
177 in pregnancy, during labour, or after delivery, and which require immediate action by healthcare  
178 professionals,<sup>2, 3</sup> while the latter involve actual or potential hazards to the health or well-being of the  
179 mother or foetus. The incidence of obstetric events used in this study was calculated based on data  
180 from 465,919 deliveries from 2008–2015 and are reported in another paper.<sup>1</sup> Data were retrieved  
181 from the Danish Medical Birth Registry, which was established in 1973 and contains information on  
182 all deliveries in Denmark, including data on the mother, child, pregnancy, and delivery.<sup>30</sup> Diagnoses  
183 are registered using International Classification of Diseases codes (ICD), 10<sup>th</sup> revision<sup>31</sup> and surgery  
184 is coded by the Danish version of the NOMESCO Classification of Surgical Procedures (NCSP).<sup>32</sup>  
185 In Denmark, all individuals have a unique personal identification number, making it possible to  
186 conduct valid registry-based studies. Diagnoses in the Danish Medical Birth Registry have been  
187 validated, and the authors found that the more severe the condition, the higher the validity of the  
188 coding.<sup>33</sup>

1  
2  
3  
4 189 The obstetric events included in our study were: Apgar score <7/5 min (ICD-10: DVA00-DVA06),  
5  
6 190 eclampsia (ICD-10: O151, O152, O159), emergency caesarean section (NCSP: KMCA10A,  
7  
8  
9 191 KMCA10D, KMCA10E), severe postpartum haemorrhage ( $\geq 1000$  ml) (ICD-10: O072, only  $\geq 1000$   
10  
11 192 ml), shoulder dystocia (ICD-10: O660, NCSP: KMAH15), umbilical cord prolapse (ICD-10: O690),  
12  
13 193 vaginal breech delivery (NCSP: DUP07-DUP11, DUP16 without caesarean sections, NCSP:  
14  
15  
16 194 KMCA10), vaginal twin delivery (ICD-10: O300, without caesarean sections, NCSP: KMCA10), and  
17  
18 195 instrumental delivery by vacuum extraction (NCSP: KMAE00, KMAE03, KMAE96). These critical  
19  
20 196 events may result in maternal and neonatal mortality and morbidity, are often subjects of clinical  
21  
22  
23 197 training.<sup>4, 5, 7, 11, 15</sup> Moreover, obstetric healthcare professionals are expected to safely and expertly  
24  
25 198 manage these events.  
26  
27 199  
28  
29  
30 200  
31

### 32 201 **Statistical analysis**

33  
34 202 The outcome of interest was the estimated average time interval between the expected acquaintance  
35  
36 203 with one obstetric event to the next similar obstetric event divided across the number of midwives,  
37  
38  
39 204 specialty trainees, and specialist doctors. We calculated the average time interval between the events  
40  
41 205 by dividing the occurrence of events per year (incidence times total number of deliveries in 2018)  
42  
43 206 with the number of healthcare professionals in the study. The result was divided by 12 to calculate  
44  
45  
46 207 the number of months between a potentially experienced event. We based the analysis on the  
47  
48 208 assumption that all healthcare professionals can learn from an event if they are either participating  
49  
50 209 hands-on or are present in the delivery room as an observer or assistant.  
51

52 210 The data was also analysed based on the alternative assumption that clinical skills can only be learned  
53  
54  
55 211 by playing an active role in managing the event. We only included specialty trainees and specialist  
56  
57  
58  
59  
60

1  
2  
3  
4 212 doctors in these calculations, since they have ultimate responsibility for delivered care and clinical  
5  
6 213 management of the respective obstetric events.  
7  
8

9 214 Since the estimates constitute average numbers, they are presented as means. The average time  
10  
11 215 interval in years is presented on a logarithmic scale to illustrate the differences between the different  
12  
13 216 obstetric events and between different healthcare professionals. Probabilities of experiencing an  
14  
15 217 obstetric emergency were calculated using Microsoft Excel (Microsoft Cooperation version 14.6.6).  
16  
17

18 218

19

## 20 219 **Patient or public involvement**

21  
22  
23 220 There was no direct patient or public involvement in this study.  
24

25 221

26

27 222

## 28 222 **Results**

29  
30 223 Denmark had 61 273 deliveries in 2018.<sup>24</sup> Table 1 presents data on the number of midwives, specialty  
31  
32 224 trainees, and specialist doctors working at one of the 21 hospital labour wards. The number of  
33  
34 225 midwives per labour ward ranged from 13 to 135.  
35

36 226

37

38

39 227 Table 2 shows the incidences of the obstetric events and the average time interval between  
40  
41 228 experiencing each of the studied obstetric event as midwives, specialty trainees, and specialist doctors  
42  
43 229 in obstetrics and gynaecology. These estimates were calculated under the assumption that all  
44  
45 230 healthcare professionals learn from an event if they either participate hands-on, observe the event, or  
46  
47  
48 231 act as an assistant.  
49

50 232

51

52  
53 233 Six of the obstetric events (eclampsia, Apgar score <7/5 min, umbilical cord prolapse, singleton  
54  
55 234 vaginal breech delivery, shoulder dystocia, and vaginal twin delivery) occurred at a low incidence of  
56  
57 235 0.05–1.00%. Three of the events (severe postpartum haemorrhage, delivery by vacuum extraction,  
58  
59

60

1  
2  
3  
4  
5  
6  
7  
8  
9  
10  
11  
12  
13  
14  
15  
16  
17  
18  
19  
20  
21  
22  
23  
24  
25  
26  
27  
28  
29  
30  
31  
32  
33  
34  
35  
36  
37  
38  
39  
40  
41  
42  
43  
44  
45  
46  
47  
48  
49  
50  
51  
52  
53  
54  
55  
56  
57  
58  
59  
60

236 and emergency caesarean section) occurred relatively often, with an incidence of 6.4–12.2%. The  
237 time interval between the events differed depending on the incidence of the event and the group of  
238 healthcare professionals. Midwives experienced eclampsia only every 42 years on average, specialty  
239 trainees every six years, and specialist doctors every 11 years.

240  
241 The events with relatively high incidence were hence experienced relatively more often. Emergency  
242 caesarean section, with an incidence of 12.2%, were experienced, on average, every other month for  
243 midwives, every nine days for specialty trainees, and every 17 days for specialist doctors.

244 Instrumental delivery with vacuum extraction and severe postpartum haemorrhage, with an incidence  
245 of 7.0% and 6.4%, respectively, were, on average, experienced by midwives every four months, by  
246 specialty trainees every 16 days, and by specialist doctors once a month (Table 2).

247  
248 Table 3 depicts the time between events for doctors based on the assumption that only the healthcare  
249 professional providing the first-line care can learn from the event. The time between experiencing  
250 eclampsia increased from 6 to 17 years when performed independently by a specialty trainee, and  
251 from 11 to 17 years when performed independently by a specialist doctor. The time interval between  
252 experiencing an emergency caesarean section increased from 9 to 25 days and from 16 to 25 days for  
253 a trainee and specialist doctor, respectively.

254

## 255 Discussion

### 256 *Main findings*

257 In this Danish national cross-sectional study examining how often an obstetric healthcare professional  
258 can expect to be involved in an obstetric emergency or a high-risk delivery, we found that the time  
259 interval between experiencing one of the obstetric events in focus per healthcare professional ranged

1  
2  
3  
4  
5  
6  
7  
8  
9  
10  
11  
12  
13  
14  
15  
16  
17  
18  
19  
20  
21  
22  
23  
24  
25  
26  
27  
28  
29  
30  
31  
32  
33  
34  
35  
36  
37  
38  
39  
40  
41  
42  
43  
44  
45  
46  
47  
48  
49  
50  
51  
52  
53  
54  
55  
56  
57  
58  
59  
60

260 from nine days to 42 years. Our data shows that midwives experienced the studied events less  
261 frequently than did specialist doctors, and specialty trainees were found to experience the events most  
262 frequently.

263

### 264 *Strengths and limitations*

265 This study addressed a gap in the research literature by calculating how often healthcare professionals  
266 can expect to experience specific obstetric emergencies or high-risk deliveries in a Danish healthcare  
267 setting. A strength of our study is that the incidence of the obstetric events was based on a large data  
268 source comprising 465 919 deliveries during a eight year period. The exact number of midwives was  
269 difficult to obtain due to diversity in work tasks and work hours. To avoid this potential bias, we  
270 included midwives working both part- and full-time on labour wards, which suggests that our results  
271 are conservative estimates.

272 Even though the number of healthcare professionals working on labour wards changes over time due  
273 to various organisational, political, and economic factors, our results are assumed to be the most valid  
274 estimates obtainable as minor variations in the numbers do not change the overall estimates  
275 substantially.

276 We used data on specific obstetric events from existing research, obtained for 2008–2015.<sup>1</sup> Data on  
277 the number of obstetric healthcare professionals were collected for 2018 since data from this year is  
278 assumed to be more valid compared to data for previous years due to the possibility of recall bias.

279 Nationally, incidences of obstetric events are fairly consistent over the years. Therefore, we have  
280 reason to believe that the different time periods used may have compromised the validity of our study  
281 results.<sup>1</sup>

1  
2  
3  
4 282 Danish labour wards differ in size and level of specialisation. Consequently, healthcare professionals  
5  
6 283 at large departments with a high level of specialisation will experience the events more often than  
7  
8  
9 284 healthcare professionals at smaller departments, and more frequently than our results suggest.  
10

11 285 Our analysis assumed that the healthcare professionals may learn from a specific obstetric event if  
12  
13 286 they are either providing care hands-on, are present in the delivery room either as an observer or as  
14  
15  
16 287 an assistant. However, if we base our findings on the assumption that each obstetric event only allow  
17  
18 288 one from each healthcare worker profession, i.e., only one midwife, one specialty trainee, and one  
19  
20 289 specialist doctor to learn from each event, then the frequency with which each of the attendants may  
21  
22  
23 290 potentially learn from these relative rare obstetric events fall significantly.  
24

### 25 291 26 27 292 *Interpretation* 28

29  
30 293 Our results demonstrated that midwives and specialist doctors can have a lifelong working life and  
31  
32 294 only experience certain severe obstetric emergencies once or twice, if at all. When emergencies occur,  
33  
34 295 however, healthcare professionals are expected to have the skills to manage the event according to  
35  
36 296 well-known, evidence-based standards of obstetric care. As a result, healthcare professionals must  
37  
38  
39 297 always be prepared for obstetric emergencies to occur. Our findings show that it is unrealistic for  
40  
41 298 healthcare professionals to obtain and maintain the competences required to manage rare obstetric  
42  
43 299 events through clinical experience alone. A common feature of the events studied is that the time  
44  
45  
46 300 interval between emergencies or high-risk deliveries depends on the healthcare professional group to  
47  
48 301 which you belong, indicating that some groups can acquire the skills based primarily on clinical  
49  
50 302 experience alone. However, alternative educational pathways must be provided for other groups. To  
51  
52  
53 303 improve patient safety, minimise litigation, and ameliorate the consequences for the healthcare  
54  
55 304 professionals involved, ensuring that they have the necessary skills to manage obstetric events must  
56  
57 305 be prioritised.<sup>22</sup>  
58  
59  
60



1  
2  
3  
4 306 Simulation-based education, which is a valuable supplement to traditional ways of learning through  
5  
6 307 clinical practices and mentorship, represent one way of ensuring acquisition of clinical skills and  
7  
8  
9 308 maintenance hereof.<sup>34</sup> Simulation-based training can identify and correct common clinical errors  
10  
11 309 made during emergencies, and has been recommended as a valuable standard supplementary to  
12  
13 310 clinical practice in order to improve care provided.<sup>23, 35, 36</sup> Obstetric emergency simulation-based  
14  
15  
16 311 training has been shown to impact the knowledge, skills, and attitudes of healthcare professionals.  
17  
18 312 Moreover, some studies have found that this type of training reduces maternal and neonatal morbidity  
19  
20 313 and mortality, though other studies have failed to show an effect on clinical outcomes.<sup>37-41</sup>  
21  
22  
23 314 Knowledge and skills deteriorate over time and must be maintained.<sup>38, 42, 43</sup> Studies show that the  
24  
25 315 level of knowledge falls within 9–15 months after obstetric skills training,<sup>38, 41, 44</sup> and some studies  
26  
27 316 suggest that annual obstetric skills training is necessary to combat this decline.<sup>42, 45</sup> Our findings allow  
28  
29  
30 317 us to differentiate between the obstetric events that require frequent simulation based training and the  
31  
32 318 ones that can generally be maintained at a certain level based on daily clinical practice alone.  
33  
34 319 Moreover, our results indicate which healthcare professionals can rely on maintaining their skills  
35  
36 320 primarily through clinical practice and who needs additional obstetric skills training. However, some  
37  
38  
39 321 argue that training individual groups of healthcare professionals is inadequate, highlighting the  
40  
41 322 importance of including all team members in a multidisciplinary team when training due to the  
42  
43 323 complexity of the skills and the rarity of certain obstetric events.<sup>38, 46</sup>  
44  
45  
46 324 Our results may be transferred to other clinical specialties in which rare clinical emergencies occur  
47  
48 325 that require prompt and professional action by healthcare professionals, e.g. abdominal aortic  
49  
50 326 aneurisms in cardiology<sup>47</sup> and paediatric emergency medicine.<sup>48</sup> Rare events in these medical  
51  
52  
53 327 specialties also represent a challenge in terms of learning the required skills via the traditional  
54  
55 328 apprenticeship model and ongoing clinical work, which is why simulation based skills training is  
56  
57 329 necessary.<sup>49</sup>  
58  
59  
60

1  
2  
3  
4  
5  
6  
7  
8  
9  
10  
11  
12  
13  
14  
15  
16  
17  
18  
19  
20  
21  
22  
23  
24  
25  
26  
27  
28  
29  
30  
31  
32  
33  
34  
35  
36  
37  
38  
39  
40  
41  
42  
43  
44  
45  
46  
47  
48  
49  
50  
51  
52  
53  
54  
55  
56  
57  
58  
59  
60

330

## 331 **Conclusion**

332 We found that some obstetric emergencies and high-risk deliveries were experienced so infrequently  
333 that the clinical skills required to competently manage the events is deemed to be impossible to obtain  
334 and maintain in clinical practice alone. Consequently, to enhance patient safety, reduce burnout in  
335 healthcare professionals, and minimise litigation costs, investing in supplementary training activities  
336 is the way forward to improving patient care. In this regard, our study contributes to assessing the  
337 need for supplementary educational initiatives.

## 339 **Acknowledgments**

340 We would like to thank the heads of midwifery from all maternity units in Denmark for providing us  
341 with data on the number of midwives employed in their units. We would like to express our deepest  
342 gratitude to senior advisor Steen Rasmussen, MSc, MPH, Rigshospitalet for managing the national  
343 registry data from the Danish Medical Birth Registry.

## 345 **Contributorship statement**

346 JLS created the idea. SH, LT, TB, ALR, MJ, and JLS participated in creating the study design. SH  
347 was responsible for collecting the data. SH and LT performed the analysis and drafted the initial  
348 manuscript. TB, ALR, MJ, and JLS reviewed and revised the manuscript for interpretation of data  
349 and critical revision of important intellectual content. All authors reviewed and approved the final  
350 manuscript as submitted.

## 352 **Details of ethics approval**

1  
2  
3  
4  
5  
6  
7  
8  
9  
10  
11  
12  
13  
14  
15  
16  
17  
18  
19  
20  
21  
22  
23  
24  
25  
26  
27  
28  
29  
30  
31  
32  
33  
34  
35  
36  
37  
38  
39  
40  
41  
42  
43  
44  
45  
46  
47  
48  
49  
50  
51  
52  
53  
54  
55  
56  
57  
58  
59  
60

353 Approval was obtained from the Danish Data Protection Agency (file no.: 2012-58-0004). As this is  
354 a registry-based study it is not legally required to obtain ethics approval from the Danish National  
355 Research Ethics Committee.<sup>50</sup>

### 356 **Disclosure of interest**

357 The authors have no conflicts of interests to disclose.

### 359 **Funding**

360 This work was supported by TrygFonden, grant number 105632.

### 362 **Data sharing statement**

363 The data that support the findings of this study are available on request from the corresponding author,  
364 (SH).

### 366 **References**

- 367 1. Hoegh S, Thellesen L, Christensen KB, et al. Incidences of obstetric outcomes and  
368 sample size calculations: A Danish national registry study based on all deliveries from 2008 to  
369 2015. *Acta Obstet Gynecol Scand* 2019; 2019/08/02. DOI: 10.1111/aogs.13700.
- 370 2. ACOG Committee. Committee opinion no. 590: preparing for clinical emergencies  
371 in obstetrics and gynecology. *Obstet Gynecol* 2014; 123: 722-725. DOI:  
372 10.1097/01.AOG.0000444442.04111.c6.
- 373 3. Oxford Dictionaries. <https://en.oxforddictionaries.com> (2018, accessed October  
374 18 2018).
- 375 4. Khan KS, Wojdyla D, Say L, et al. WHO analysis of causes of maternal death: a  
376 systematic review. *The Lancet* 2006; 367: 1066-1074.
- 377 5. Cantwell R, Clutton-Brock T, Cooper G, et al. Saving Mothers' Lives: Reviewing  
378 maternal deaths to make motherhood safer: 2006-2008. The Eighth Report of the Confidential  
379 Enquiries into Maternal Deaths in the United Kingdom. *BJOG* 2011; 118 Suppl 1: 1-203. DOI:  
380 10.1111/j.1471-0528.2010.02847.x.
- 381 6. Ozimek JA, Eddins RM, Greene N, et al. Opportunities for improvement in care  
382 among women with severe maternal morbidity. *Am J Obstet Gynecol* 2016; 215: 509 e501-506.  
383 DOI: 10.1016/j.ajog.2016.05.022.

- 1  
2  
3  
4 384 7. Berglund S, Grunewald C, Pettersson H, et al. Risk factors for asphyxia associated  
5 385 with substandard care during labor. *Acta Obstet Gynecol Scand* 2010; 89: 39-48. DOI:  
6 386 10.3109/00016340903418751.
- 8 387 8. Milsom I, Ladfors L, Thiringer K, et al. Influence of maternal, obstetric and fetal risk  
9 388 factors on the prevalence of birth asphyxia at term in a Swedish urban population. *Acta Obstet*  
10 389 *Gynecol Scand* 2002; 81: 909-917.
- 11 390 9. Hannah ME, Hannah WJ, Hewson SA, et al. Planned caesarean section versus  
12 391 planned vaginal birth for breech presentation at term: a randomised multicentre trial. Term  
13 392 Breech Trial Collaborative Group. *Lancet* 2000; 356: 1375-1383.
- 15 393 10. Barrett JF, Hannah ME, Hutton EK, et al. A randomized trial of planned cesarean or  
16 394 vaginal delivery for twin pregnancy. *N Engl J Med* 2013; 369: 1295-1305. 2013/10/04. DOI:  
17 395 10.1056/NEJMoa1214939.
- 18 396 11. Hove LD, Bock J, Christoffersen JK, et al. Analysis of 127 peripartum hypoxic brain  
19 397 injuries from closed claims registered by the Danish Patient Insurance Association. *Acta Obstet*  
20 398 *Gynecol Scand* 2008; 87: 72-75. DOI: 10.1080/00016340701797567.
- 22 399 12. Berglund S, Pettersson H, Cnattingius S, et al. How often is a low Apgar score the  
23 400 result of substandard care during labour? *BJOG* 2010; 117: 968-978. DOI: 10.1111/j.1471-  
24 401 0528.2010.02565.x.
- 25 402 13. MBRRACE-UK. *MBRRACE-UK 2017 Perinatal Confidential Enquiry: Term, singleton,*  
26 403 *intrapartum stillbirth and intrapartum-related neonatal death.* . 2017. Leicester: The Infant  
28 404 Mortality and Morbidity Studies, Department of Health Sciences, University of Leicester:.
- 29 405 14. MBRRACE-UK. *Saving Lives, Improving Mothers' Care - Lessons learned to inform*  
30 406 *maternity care from the UK and*  
31 407 *Ireland Confidential Enquiries into Maternal Deaths and Morbidity 2013-15.* 2017. Oxford:  
32 408 National Perinatal  
33 409 Epidemiology Unit, University of Oxford.
- 35 410 15. Berglund S, Grunewald C, Pettersson H, et al. Severe asphyxia due to delivery-  
36 411 related malpractice in Sweden 1990-2005. *BJOG* 2008; 115: 316-323. DOI: 10.1111/j.1471-  
37 412 0528.2007.01602.x.
- 38 413 16. Knight M, Bunch K, Tuffnell D, et al. *Saving Lives, Improving Mothers' Care. Lessons*  
39 414 *learned to inform maternity care from the UK and Ireland Confidential Enquiries into Maternal*  
40 415 *Deaths and Morbidity 2015-17.* 2019. Oxford: National Perinatal Epidemiology Unit, University  
42 416 of Oxford.
- 43 417 17. Seys D, Wu AW, Van Gerven E, et al. Health care professionals as second victims  
44 418 after adverse events: a systematic review. *Eval Health Prof* 2013; 36: 135-162. 2012/09/15.  
45 419 DOI: 10.1177/0163278712458918.
- 46 420 18. Wahlberg A, Andreen Sachs M, Johannesson K, et al. Post-traumatic stress  
47 421 symptoms in Swedish obstetricians and midwives after severe obstetric events: a cross-  
48 422 sectional retrospective survey. *BJOG* 2017; 124: 1264-1271. 2016/08/27. DOI: 10.1111/1471-  
49 423 0528.14259.
- 51 424 19. Robertson JH and Thomson AM. An exploration of the effects of clinical negligence  
52 425 litigation on the practice of midwives in England: A phenomenological study. *Midwifery* 2016;  
53 426 33: 55-63. 2015/11/04. DOI: 10.1016/j.midw.2015.10.005.
- 55 427 20. Bourne T, Vanderhaegen J, Vranken R, et al. Doctors' experiences and their  
56 428 perception of the most stressful aspects of complaints processes in the UK: an analysis of  
57 429 qualitative survey data. *BMJ Open* 2016; 6: e011711. 2016/07/06. DOI: 10.1136/bmjopen-  
58 430 2016-011711.
- 59  
60

1

2

3

- 4 431 21. Wu AW. Medical error: the second victim. The doctor who makes the mistake  
5 432 needs help too. *BMJ* 2000; 320: 726-727. 2000/03/17. DOI: 10.1136/bmj.320.7237.726.
- 6 433 22. Yau CWH, Leigh B, Liberati E, et al. Clinical negligence costs: taking action to  
7 434 safeguard NHS sustainability. *BMJ* 2020; 368: m552. 2020/03/04. DOI: 10.1136/bmj.m552.
- 8 435 23. NHS Litigation Authority. *Ten years of maternity claims. An analysis of nhs litigation*  
9 436 *authority data*. 2012. London: NHS LA.
- 10 437 24. National Health Data Authority. Medicinsk Fødselsregister,  
11 438 [https://sundhedsdatastyrelsen.dk/da/registre-og-services/om-de-nationale-](https://sundhedsdatastyrelsen.dk/da/registre-og-services/om-de-nationale-sundhedsregistre/graviditet-foedsler-og-boern/foedselsregisteret)  
12 439 [sundhedsregistre/graviditet-foedsler-og-boern/foedselsregisteret](https://sundhedsdatastyrelsen.dk/da/registre-og-services/om-de-nationale-sundhedsregistre/graviditet-foedsler-og-boern/foedselsregisteret) (accessed 11 April 2018).
- 13 440 25. Sundhedsstyrelsen. *Anbefalinger for svangreomsorgen*. 2013. Copenhagen.
- 14 441 26. National Board of Health. *Postgraduate medical training in Denmark – status and*  
15 442 *future perspectives. Summary in English*. 2012. Copenhagen: National Board of Health.
- 16 443 27. Danish Health Authority. *Lægeprognose 2015-2040 Udbuddet af læger og*  
17 444 *speciallæger*. 2016. Copenhagen: Sundhedsstyrelsen.
- 18 445 28. Danish Health Authority. *Opplåede og besatte hoveduddannelsesforløb i 2016*.  
19 446 2017. Copenhagen.
- 20 447 29. Thellesen L, Sorensen JL, Hedegaard M, et al. Cardiotocography interpretation  
21 448 skills and the association with size of maternity unit, years of obstetric work experience and  
22 449 healthcare professional background: a national cross-sectional study. *Acta Obstet Gynecol Scand*  
23 450 2017; 96: 1075-1083. DOI: 10.1111/aogs.13171.
- 24 451 30. Langhoff-Roos J, Krebs L, Klungsoyr K, et al. The Nordic medical birth registers--a  
25 452 potential goldmine for clinical research. *Acta Obstet Gynecol Scand* 2014; 93: 132-137.
- 26 453 31. World Health Organization. *International Classification of Diseases and Related*  
27 454 *Health Problems*. 2016.
- 28 455 32. Nordic Centre for Classification in Healthcare. NOMESCO Classification of Surgical  
29 456 Procedures (NSCP), <https://medinfo.dk/sks/brows.php> (2012, Version 1.16).
- 30 457 33. Bliddal M, Broe A, Pottgard A, et al. The Danish Medical Birth Register. *Eur J*  
31 458 *Epidemiol* 2018; 33: 27-36. 2018/01/20. DOI: 10.1007/s10654-018-0356-1.
- 32 459 34. Cook DA, Hatala R, Brydges R, et al. Technology-enhanced simulation for health  
33 460 professions education: a systematic review and meta-analysis. *JAMA* 2011; 306: 978-988.  
34 461 2011/09/09. DOI: 10.1001/jama.2011.1234.
- 35 462 35. and ACoO and Gynecologists. Committee opinion no. 590: preparing for clinical  
36 463 emergencies in obstetrics and gynecology. *Obstet Gynecol* 2014; 123: 722-725. 2014/02/21.  
37 464 DOI: 10.1097/01.AOG.0000444442.04111.c6.
- 38 465 36. Gardner R and Raemer DB. Simulation in obstetrics and gynecology. *Obstet Gynecol*  
39 466 *Clin North Am* 2008; 35: 97-127, ix. 2008/03/06. DOI: 10.1016/j.ogc.2007.12.008.
- 40 467 37. Bergh AM, Baloyi S and Pattinson RC. What is the impact of multi-professional  
41 468 emergency obstetric and neonatal care training? *Best Pract Res Clin Obstet Gynaecol* 2015; 29:  
42 469 1028-1043. DOI: 10.1016/j.bpobgyn.2015.03.017.
- 43 470 38. Merien AE, van de Ven J, Mol BW, et al. Multidisciplinary team training in a  
44 471 simulation setting for acute obstetric emergencies: a systematic review. *Obstet Gynecol* 2010;  
45 472 115: 1021-1031. DOI: 10.1097/AOG.0b013e3181d9f4cd.
- 46 473 39. Draycott T, Sibanda T, Owen L, et al. Does training in obstetric emergencies  
47 474 improve neonatal outcome? *BJOG* 2006; 113: 177-182. 2006/01/18. DOI: 10.1111/j.1471-  
48 475 0528.2006.00800.x.
- 49 476 40. Lenguerrand E, Winter C, Siassakos D, et al. Effect of hands-on interprofessional  
50 477 simulation training for local emergencies in Scotland: the THISTLE stepped-wedge design  
51 478  
52 479  
53 480  
54 481  
55 482  
56 483  
57 484  
58 485  
59 486  
60 487

- 1  
2  
3  
4 478 randomised controlled trial. *BMJ Qual Saf* 2020; 29: 122-134. 2019/07/16. DOI:  
5 479 10.1136/bmjqs-2018-008625.  
6  
7 480 41. Sorensen JL, Lokkegaard E, Johansen M, et al. The implementation and evaluation  
8 481 of a mandatory multi-professional obstetric skills training program. *Acta Obstet Gynecol Scand*  
9 482 2009; 88: 1107-1117. DOI: 10.1080/00016340903176834.  
10 483 42. Crofts JF, Fox R, Draycott TJ, et al. Retention of factual knowledge after practical  
11 484 training for intrapartum emergencies. *Int J Gynaecol Obstet* 2013; 123: 81-85. DOI:  
12 485 10.1016/j.ijgo.2013.04.015.  
13 486 43. Crofts JF, Bartlett C, Ellis D, et al. Management of shoulder dystocia: skill retention  
14 487 6 and 12 months after training. *Obstet Gynecol* 2007; 110: 1069-1074. 2007/11/06. DOI:  
15 488 10.1097/01.AOG.0000286779.41037.38.  
16 489 44. Nelissen E, Ersdal H, Mduma E, et al. Helping Mothers Survive Bleeding After Birth:  
17 490 retention of knowledge, skills, and confidence nine months after obstetric simulation-based  
18 491 training. *BMC Pregnancy Childbirth* 2015; 15: 190. 2015/08/26. DOI: 10.1186/s12884-015-  
19 492 0612-2.  
20 493 45. Draycott TJ, Collins KJ, Crofts JF, et al. Myths and realities of training in obstetric  
21 494 emergencies. *Best Pract Res Clin Obstet Gynaecol* 2015; 29: 1067-1076. 2015/08/10. DOI:  
22 495 10.1016/j.bpobgyn.2015.07.003.  
23 496 46. Siassakos D, Fox R, Bristowe K, et al. What makes maternity teams effective and  
24 497 safe? Lessons from a series of research on teamwork, leadership and team training. *Acta Obstet*  
25 498 *Gynecol Scand* 2013; 92: 1239-1243. 2013/08/29. DOI: 10.1111/aogs.12248.  
26 499 47. Lilja F, Mani K and Wanhainen A. Editor's Choice - Trend-break in Abdominal  
27 500 Aortic Aneurysm Repair With Decreasing Surgical Workload. *Eur J Vasc Endovasc Surg* 2017;  
28 501 53: 811-819. 2017/04/11. DOI: 10.1016/j.ejvs.2017.02.031.  
29 502 48. Meyer L, Stubbs B, Fahrenbruch C, et al. Incidence, causes, and survival trends from  
30 503 cardiovascular-related sudden cardiac arrest in children and young adults 0 to 35 years of age:  
31 504 a 30-year review. *Circulation* 2012; 126: 1363-1372. 2012/08/14. DOI:  
32 505 10.1161/CIRCULATIONAHA.111.076810.  
33 506 49. Nayahangan LJ, Lawaetz J, Strom M, et al. Ensuring Competency in Open Aortic  
34 507 Aneurysm Repair - Development and Validation of a New Assessment Tool. *Eur J Vasc Endovasc*  
35 508 *Surg* 2020; 59: 767-774. 2020/02/25. DOI: 10.1016/j.ejvs.2020.01.021.  
36 509 50. The National Committee on Health Research Ethics. Act on Research Ethics Review  
37 510 of Health Research Projects: Part 4, section 14-2, <http://www.nvk.dk/english/act-on-research>  
38 511 (2013, accessed June 18 2018).  
39 512  
40  
41  
42  
43  
44  
45  
46  
47 513  
48  
49  
50  
51  
52  
53  
54  
55  
56  
57  
58  
59  
60

1  
2  
3  
4 514 **Table Caption List**

5  
6 515 **Table 1.** Approximate number of obstetric healthcare professionals working in Danish labour wards  
7  
8  
9 516 in 2018

10  
11 517 **Table 2.** Estimated time between obstetric emergency or high-risk delivery divided across midwives,  
12  
13 518 specialty trainees, and doctors specialised in obstetrics and gynaecology.

14  
15  
16 519 **Table 3.** Estimated time between expected obstetric emergency or high-risk delivery managed by  
17  
18 520 either a specialty trainee or doctor specialised in obstetrics and gynaecology.

19  
20 521

**Table 1.** Approximate numbers of obstetric healthcare professionals working in one of the 21 Danish hospital labour wards in 2018.

| <b>Obstetric healthcare professionals</b>          | <b>Approximate number of healthcare professionals</b> |
|----------------------------------------------------|-------------------------------------------------------|
| Midwives                                           | 1300                                                  |
| Specialty trainees in obstetrics and gynaecology   | 180                                                   |
| Doctors specialising in obstetrics and gynaecology | 340                                                   |

For peer review only



1

2

3

4 527

5 528

6

7

8

9

10

11

12

13

14

15

16

17

18

19

20

21

22

23

24

25

26

27

28

29

30

31

32

33

34

35 529

36 530

37 531

38 532

39 533

40 534

41 535

42 536

43 537

44

45

46

47

48

49

50

51

52

53

54

55

56

57

58

59

60

**Table 2.** Estimated time between obstetric emergency or high-risk delivery divided across midwives, specialty trainees, and doctors specialised in obstetrics and gynaecology

| Obstetric events <sup>a,b</sup>   | Incidence (%) | Expected time between obstetric events <sup>c</sup> divided across healthcare professionals |                    |                    |
|-----------------------------------|---------------|---------------------------------------------------------------------------------------------|--------------------|--------------------|
|                                   |               | Midwives                                                                                    | Specialty trainees | Specialist doctors |
| Eclampsia                         | 0.05          | 42 years                                                                                    | 6 years            | 11 years           |
| Umbilical cord prolapse           | 0.10          | 21 years                                                                                    | 3 years            | 5.5 years          |
| Singleton vaginal breech delivery | 0.50          | 4 years                                                                                     | 7 months           | 1 year             |
| Apgar score <7/5 min.             | 0.90          | 2.5 years                                                                                   | 4 months           | 8 months           |
| Shoulder dystocia                 | 1.00          | 2 years                                                                                     | 4 months           | 7 months           |
| Vaginal twin delivery             | 1.00          | 2 years                                                                                     | 4 months           | 7 months           |
| Severe postpartum haemorrhage     | 6.40          | 4 months                                                                                    | 17 days            | 1 month            |
| Vacuum extraction                 | 7.00          | 4 months                                                                                    | 15 days            | 1 month            |
| Emergency caesarean section       | 12.20         | 2 months                                                                                    | 9 days             | 16 days            |

Calculations based on the assumption that all healthcare professionals can learn from an event if they participate hands-on, observe or assist at the event.

<sup>a</sup> One delivery can be represented more than once at the obstetric events.

<sup>b</sup> The obstetric event incidence is based on deliveries in Denmark from 2008–2015, with gestational age 20+0 to 45+0. In the event of multiple foetuses in one pregnancy, an event among one or more newborns counts.

<sup>c</sup> Number of events per year are calculated based on number of deliveries in Denmark in 2018 (61 273 deliveries). Numbers are rounded up or down to nearest 0.5 years or months.

**Table 3.** Estimated time between obstetric emergency or high-risk delivery managed by either a specialty trainee or a doctor specialising in obstetrics and gynaecology.

| Obstetric events <sup>a,b</sup>   | Incidence (%) | Time interval between events <sup>c</sup>                  |
|-----------------------------------|---------------|------------------------------------------------------------|
|                                   |               | Managed by either a specialty trainee or specialist doctor |
| Eclampsia                         | 0.05          | 17 years                                                   |
| Umbilical cord prolapse           | 0.10          | 8.5 years                                                  |
| Singleton vaginal breech delivery | 0.50          | 1.7 years                                                  |
| Apgar score <7/5 min.             | 0.90          | 11 months                                                  |
| Shoulder dystocia                 | 1.00          | 10 months                                                  |
| Vaginal twin delivery             | 1.00          | 10 months                                                  |
| Severe postpartum haemorrhage     | 6.40          | 1.5 months                                                 |
| Vacuum extraction                 | 7.00          | 1.5 months                                                 |
| Emergency caesarean section       | 12.20         | 25 days                                                    |

The calculations are based on the assumption that only one healthcare professional can learn from the event (hands-on experience).

<sup>b</sup> The obstetric events included all deliveries in Denmark from 2008–2015, with gestational age 20+0 to 45+0. In the event of multiple foetuses in one pregnancy, an event among one or more of the newborns counts.

<sup>c</sup> Number of events are calculated based on the number of deliveries in 2018 in Denmark (61 273 deliveries). Numbers are rounded up or down to nearest 0.5 years or months.

**STROBE 2007 (v4) Statement—Checklist of items that should be included in reports of *cross-sectional studies***

| Section/Topic                | Item # | Recommendation                                                                                                                                                                       | Reported on page # |
|------------------------------|--------|--------------------------------------------------------------------------------------------------------------------------------------------------------------------------------------|--------------------|
| <b>Title and abstract</b>    | 1      | (a) Indicate the study’s design with a commonly used term in the title or the abstract                                                                                               | 1                  |
|                              |        | (b) Provide in the abstract an informative and balanced summary of what was done and what was found                                                                                  | 2                  |
| <b>Introduction</b>          |        |                                                                                                                                                                                      |                    |
| Background/rationale         | 2      | Explain the scientific background and rationale for the investigation being reported                                                                                                 | 5                  |
| Objectives                   | 3      | State specific objectives, including any prespecified hypotheses                                                                                                                     | 6                  |
| <b>Methods</b>               |        |                                                                                                                                                                                      |                    |
| Study design                 | 4      | Present key elements of study design early in the paper                                                                                                                              | 6                  |
| Setting                      | 5      | Describe the setting, locations, and relevant dates, including periods of recruitment, exposure, follow-up, and data collection                                                      | 6-10               |
| Participants                 | 6      | (a) Give the eligibility criteria, and the sources and methods of selection of participants                                                                                          | 6                  |
| Variables                    | 7      | Clearly define all outcomes, exposures, predictors, potential confounders, and effect modifiers. Give diagnostic criteria, if applicable                                             | 10                 |
| Data sources/<br>measurement | 8*     | For each variable of interest, give sources of data and details of methods of assessment (measurement). Describe comparability of assessment methods if there is more than one group | 10                 |
| Bias                         | 9      | Describe any efforts to address potential sources of bias                                                                                                                            | 9                  |
| Study size                   | 10     | Explain how the study size was arrived at                                                                                                                                            | 7-8                |
| Quantitative variables       | 11     | Explain how quantitative variables were handled in the analyses. If applicable, describe which groupings were chosen and why                                                         | 10                 |
| Statistical methods          | 12     | (a) Describe all statistical methods, including those used to control for confounding                                                                                                | 10-11              |
|                              |        | (b) Describe any methods used to examine subgroups and interactions                                                                                                                  | 10-11              |
|                              |        | (c) Explain how missing data were addressed                                                                                                                                          | N/A                |
|                              |        | (d) If applicable, describe analytical methods taking account of sampling strategy                                                                                                   | N/A                |
|                              |        | (e) Describe any sensitivity analyses                                                                                                                                                | N/A                |
| <b>Results</b>               |        |                                                                                                                                                                                      |                    |

|                          |     |                                                                                                                                                                                                              |       |
|--------------------------|-----|--------------------------------------------------------------------------------------------------------------------------------------------------------------------------------------------------------------|-------|
| Participants             | 13* | (a) Report numbers of individuals at each stage of study—eg numbers potentially eligible, examined for eligibility, confirmed eligible, included in the study, completing follow-up, and analysed            | 11    |
|                          |     | (b) Give reasons for non-participation at each stage                                                                                                                                                         | N/A   |
|                          |     | (c) Consider use of a flow diagram                                                                                                                                                                           | N/A   |
| Descriptive data         | 14* | (a) Give characteristics of study participants (eg demographic, clinical, social) and information on exposures and potential confounders                                                                     | N/A   |
|                          |     | (b) Indicate number of participants with missing data for each variable of interest                                                                                                                          | N/A   |
| Outcome data             | 15* | Report numbers of outcome events or summary measures                                                                                                                                                         | 11-12 |
| Main results             | 16  | (a) Give unadjusted estimates and, if applicable, confounder-adjusted estimates and their precision (eg, 95% confidence interval). Make clear which confounders were adjusted for and why they were included | N/A   |
|                          |     | (b) Report category boundaries when continuous variables were categorized                                                                                                                                    | N/A   |
|                          |     | (c) If relevant, consider translating estimates of relative risk into absolute risk for a meaningful time period                                                                                             | N/A   |
| Other analyses           | 17  | Report other analyses done—eg analyses of subgroups and interactions, and sensitivity analyses                                                                                                               | 12    |
| <b>Discussion</b>        |     |                                                                                                                                                                                                              |       |
| Key results              | 18  | Summarise key results with reference to study objectives                                                                                                                                                     | 12    |
| Limitations              | 19  | Discuss limitations of the study, taking into account sources of potential bias or imprecision. Discuss both direction and magnitude of any potential bias                                                   | 13-14 |
| Interpretation           | 20  | Give a cautious overall interpretation of results considering objectives, limitations, multiplicity of analyses, results from similar studies, and other relevant evidence                                   | 14-15 |
| Generalisability         | 21  | Discuss the generalisability (external validity) of the study results                                                                                                                                        | 15    |
| <b>Other information</b> |     |                                                                                                                                                                                                              |       |
| Funding                  | 22  | Give the source of funding and the role of the funders for the present study and, if applicable, for the original study on which the present article is based                                                | 3     |

\*Give information separately for cases and controls in case-control studies and, if applicable, for exposed and unexposed groups in cohort and cross-sectional studies.

**Note:** An Explanation and Elaboration article discusses each checklist item and gives methodological background and published examples of transparent reporting. The STROBE checklist is best used in conjunction with this article (freely available on the Web sites of PLoS Medicine at <http://www.plosmedicine.org/>, Annals of Internal Medicine at <http://www.annals.org/>, and Epidemiology at <http://www.epidem.com/>). Information on the STROBE Initiative is available at [www.strobe-statement.org](http://www.strobe-statement.org).

# BMJ Open

## How often will midwives and obstetricians experience obstetric emergencies or high-risk deliveries: a national cross-sectional study

|                                 |                                                                                                                                                                                                                                                                                                                                                                                                                                                                                                                                     |
|---------------------------------|-------------------------------------------------------------------------------------------------------------------------------------------------------------------------------------------------------------------------------------------------------------------------------------------------------------------------------------------------------------------------------------------------------------------------------------------------------------------------------------------------------------------------------------|
| Journal:                        | <i>BMJ Open</i>                                                                                                                                                                                                                                                                                                                                                                                                                                                                                                                     |
| Manuscript ID                   | bmjopen-2021-050790.R1                                                                                                                                                                                                                                                                                                                                                                                                                                                                                                              |
| Article Type:                   | Original research                                                                                                                                                                                                                                                                                                                                                                                                                                                                                                                   |
| Date Submitted by the Author:   | 03-Oct-2021                                                                                                                                                                                                                                                                                                                                                                                                                                                                                                                         |
| Complete List of Authors:       | Høgh, Stinne; Rigshospitalet, Department of Obstetrics Thellessen, Line; Rigshospitalet University Hospital Bergholt, Thomas; Rigshospitalet, Dept. of Obstetrics and Gynecology Rom, Ane; Rigshospitalet, University of Copenhagen, Juliane Marie Centre for Children, Women and reproduction section 4074 Johansen, Marianne; Rigshospitalet, Department of obstetrics Sorensen, Jette Led; Rigshospitalet, University of Copenhagen, Juliane Marie Centre for Children, Women and reproduction section 4074; Jette Led Sorensen, |
| <b>Primary Subject Heading</b>: | Obstetrics and gynaecology                                                                                                                                                                                                                                                                                                                                                                                                                                                                                                          |
| Secondary Subject Heading:      | Emergency medicine, Epidemiology, Medical education and training, Obstetrics and gynaecology                                                                                                                                                                                                                                                                                                                                                                                                                                        |
| Keywords:                       | OBSTETRICS, MEDICAL EDUCATION & TRAINING, ACCIDENT & EMERGENCY MEDICINE                                                                                                                                                                                                                                                                                                                                                                                                                                                             |
|                                 |                                                                                                                                                                                                                                                                                                                                                                                                                                                                                                                                     |

SCHOLARONE™  
Manuscripts



I, the Submitting Author has the right to grant and does grant on behalf of all authors of the Work (as defined in the below author licence), an exclusive licence and/or a non-exclusive licence for contributions from authors who are: i) UK Crown employees; ii) where BMJ has agreed a CC-BY licence shall apply, and/or iii) in accordance with the terms applicable for US Federal Government officers or employees acting as part of their official duties; on a worldwide, perpetual, irrevocable, royalty-free basis to BMJ Publishing Group Ltd ("BMJ") its licensees and where the relevant Journal is co-owned by BMJ to the co-owners of the Journal, to publish the Work in this journal and any other BMJ products and to exploit all rights, as set out in our [licence](#).

The Submitting Author accepts and understands that any supply made under these terms is made by BMJ to the Submitting Author unless you are acting as an employee on behalf of your employer or a postgraduate student of an affiliated institution which is paying any applicable article publishing charge ("APC") for Open Access articles. Where the Submitting Author wishes to make the Work available on an Open Access basis (and intends to pay the relevant APC), the terms of reuse of such Open Access shall be governed by a Creative Commons licence – details of these licences and which [Creative Commons](#) licence will apply to this Work are set out in our licence referred to above.

Other than as permitted in any relevant BMJ Author's Self Archiving Policies, I confirm this Work has not been accepted for publication elsewhere, is not being considered for publication elsewhere and does not duplicate material already published. I confirm all authors consent to publication of this Work and authorise the granting of this licence.

1  
2  
3  
4 1 **How often will midwives and obstetricians experience obstetric emergencies or high-risk**  
5  
6 2 **deliveries: a national cross-sectional study**  
7  
8

9 3

10  
11 4 **Authors**  
12

13 5 Stinne Høgh<sup>1</sup>, Line Thellesen<sup>1</sup>, Thomas Bergholt<sup>1,2</sup>, Ane Lilleøre Rom<sup>1</sup>, Marianne Johansen<sup>1</sup> & Jette  
14  
15 6 Led Sørensen<sup>1,2</sup>  
16  
17

18 7

19  
20 8 **Author affiliations and addresses**  
21

22 9 <sup>1</sup>Department of Obstetrics, Juliane Marie Centre, Rigshospitalet, University of Copenhagen,  
23  
24 Blegdamsvej 9, 2100 Copenhagen, Denmark  
25 10

26  
27 11 <sup>2</sup>Department of Clinical Medicine, University of Copenhagen, Blegdamsvej 3B, 2200 Copenhagen,  
28  
29 12 Denmark  
30  
31

32 13

33  
34 14 **Corresponding author**  
35

36 15 Stinne Høgh  
37

38  
39 16 Department of Obstetrics, Juliane Marie Centre, Rigshospitalet University Hospital, University of  
40  
41 17 Copenhagen, Blegdamsvej 9, 2100 Copenhagen, Denmark  
42

43 18 Tel: +45 22973556  
44

45 19 Email address: [stinne.hoegh@regionh.dk](mailto:stinne.hoegh@regionh.dk)  
46  
47

48 20

49  
50 21 **Running title**  
52

53 22 Obtaining skills in managing obstetric emergencies  
54  
55  
56  
57  
58  
59  
60

## 23 **Abstract**

### 24 **Objective**

25 To estimate how often midwives, specialty trainees, and doctors specialised in obstetrics and  
26 gynaecology are attending to specific obstetric emergencies or high-risk deliveries (obstetric events).

### 27 **Design**

28 A national cross-sectional study.

### 29 **Setting**

30 All hospital labour wards in Denmark.

### 31 **Participants**

32 Midwives (n=1303), specialty trainees (n=179), and doctors specialised in obstetrics and gynaecology  
33 (n=343) working in hospital labour wards (n=21) in Denmark in 2018.

### 34 **Methods**

35 Categories of obstetric events comprised of Apgar score <7/5 min, eclampsia, emergency caesarean  
36 sections, severe postpartum haemorrhage, shoulder dystocia, umbilical cord prolapse, vaginal breech  
37 deliveries, vaginal twin deliveries, and vacuum extraction. Data on number of healthcare  
38 professionals were obtained through the Danish maternity wards, the Danish Health Authority and  
39 the Danish Society of Obstetricians and Gynaecologists. We calculated the time interval between  
40 attending each obstetric event by dividing the number of events occurred with the number of  
41 healthcare professionals.

### 42 **Outcome measures**

43 The time interval between attending a specific obstetric event.

### 44 **Results**

45 The average time between experiencing obstetric events ranged from days to years. Emergency  
46 caesarean sections, which occur relatively frequent, were attended on average every other month by



1  
2  
3  
4 47 midwives, every nine days for specialty trainees, and every 17 days by specialist doctors. On average,  
5  
6 48 rare events like eclampsia were experienced by midwives only every 42 years, every six years by  
7  
8  
9 49 specialty trainees, and every 11 years by specialist doctors.  
10

## 11 50 **Conclusions**

12  
13 51 Some obstetric events occur extremely rarely, hindering the ability to obtain and maintain the clinical  
14  
15 52 skills to manage them through clinical practice alone. By assessing the frequency of a healthcare  
16  
17 53 professionals attending an obstetric emergency our study contributes to assessing the need for  
18  
19 54 supplementary educational initiatives and interventions to learn and maintain clinical skills.  
20  
21  
22  
23 55

## 24 25 56 **Strengths and limitations of this study**

- 26  
27 57
- 28 • The first study to calculate how often healthcare professionals can expect to attend specific  
29  
30 58 obstetric emergencies or high-risk deliveries in clinical real life.
  - 31  
32 59 • The incidence of the obstetric events was based on a large data source comprising 465,919  
33  
34 60 deliveries during an eight-year period.
  - 35  
36 61 • The study comprised medical doctors and midwives working at all the labour wards  
37  
38 62 throughout Denmark.
  - 39  
40 63 • Our findings are based on average estimates, and results may be skewed by national variation  
41  
42 64 in clinical experience and interest as well as regional clinical practice.
  - 43  
44 65 • Differences in the size and level of specialisation in the labour wards may influence the  
45  
46 66 frequency of experiencing the events.  
47  
48  
49  
50  
51 67
- 52  
53  
54  
55  
56  
57  
58  
59  
60

1  
2  
3  
4  
5  
6  
7  
8  
9  
10  
11  
12  
13  
14  
15  
16  
17  
18  
19  
20  
21  
22  
23  
24  
25  
26  
27  
28  
29  
30  
31  
32  
33  
34  
35  
36  
37  
38  
39  
40  
41  
42  
43  
44  
45  
46  
47  
48  
49  
50  
51  
52  
53  
54  
55  
56  
57  
58  
59  
60

68 **Keywords**

69 Obstetrics, pregnancy outcome, obstetric emergencies, obstetric nursing/education, emergency  
70 treatment

71 **Disclosure of interest**

72 The authors have no conflicts of interests to disclose.

For peer review only

## 74 **Introduction**

75 In high-income countries most pregnancies have good outcomes. Obstetric emergencies like  
76 eclampsia, severe postpartum haemorrhage, shoulder dystocia, and umbilical cord prolapse are  
77 fortunately rare obstetric events.<sup>1</sup> These potentially life threatening emergencies often occur  
78 unexpectedly, and require immediate action by healthcare professionals<sup>2, 3</sup> and may entail tragic  
79 consequences such as death or serious morbidity in women and/or newborns.<sup>4-6</sup>

80 Obstetric emergencies often occur in extremely stressful settings that require highly professional  
81 communication and teamwork skills in order to take appropriate action. Similarly, high-risk deliveries,  
82 like vaginal twin or breech deliveries, also require highly specialised skills in healthcare professionals  
83 attending the event to ensure good outcomes.<sup>7-10</sup>

84 Healthcare professionals must be qualified to manage these emergencies and high-risk deliveries  
85 (obstetric events) to ensure patient safety. However, audit based studies have shown how these events  
86 are not always managed according to well-known, evidence-based standards of obstetric care.<sup>5, 6, 11-</sup>

87 <sup>15</sup> An analysis of 127 cases of peripartum hypoxic brain injuries in claims registered by the Danish  
88 Patient Insurance Association concluded that all of the injuries were potentially avoidable if standard  
89 obstetric care had been applied.<sup>11</sup> Substandard care was also found in 42% of deliveries with low  
90 Apgar scores in Sweden,<sup>12</sup> and in the United Kingdom in nearly half of intrapartum stillbirths and in  
91 half of the intrapartum-related neonatal deaths.<sup>13</sup> Studies of maternal deaths in the United Kingdom  
92 found that substandard care during pregnancy or delivery had occurred in 29% of cases.<sup>16</sup>

93 Clinical negligence is devastating to the family involved, just as the healthcare professionals involved  
94 may experience emotional, behavioural, and cognitive consequences in terms of anxiety, depression  
95 symptoms,<sup>17</sup> post-traumatic stress disorder,<sup>18</sup> and loss of professional confidence, leading to self-  
96 doubt, isolation, practicing defensive medicine, and fear.<sup>19, 20</sup> Healthcare professionals involved in  
97 cases of clinical negligence are often referred to as second victims.<sup>17, 18, 21</sup> Moreover, cases of clinical

1  
2  
3  
4 98 negligence often entail high litigation and future healthcare costs.<sup>22, 23</sup> Hence, to safeguard the women  
5  
6 99 and prevent avoidable harm due to substandard obstetric care, and subsequent litigation and  
7  
8  
9 100 healthcare costs, the level of quality of managing obstetric events must be improved. It is well-known  
10  
11 101 that we are challenged in obtaining and maintaining the necessary clinical skills to manage rare  
12  
13 102 obstetric events in “real work-life”. However, no study has previously quantified this challenge.  
14  
15

16 103  
17  
18 104 This study aimed to estimate how often midwives, specialty trainees, and doctors specialised in  
19  
20 105 obstetrics and gynaecology on average can expect to attend and get involved in obstetric emergencies  
21  
22  
23 106 and high-risk deliveries.  
24

25 107

## 27 108 **Methods**

### 30 109 **Study design and setting**

32 110 We conducted a national cross-sectional study that included midwives, specialty trainees, and doctors  
33  
34 111 specialised in obstetrics and gynaecology (specialist doctors) working clinically in hospital-based  
35  
36  
37 112 labour wards in Denmark in 2018. There are approximately 60,000 deliveries in Denmark annually,  
38  
39 113 with 96-98% occurring at public hospitals and 2-3% as home births.<sup>24</sup>  
40

41 114 In 2018 Denmark had 21 labour wards, all of them staffed with in-house, on-call specialist doctors in  
42  
43  
44 115 obstetrics and gynaecology as well as anaesthesiology specialist doctors. The wards vary in size and  
45  
46 116 specialty level from highly specialised tertiary referral centres (the largest with about 7000 deliveries  
47  
48 117 per year) to small departments with only 600–1000 deliveries per year. All low-risk deliveries are  
49  
50  
51 118 attended by midwives often accompanied by midwifery students, during the active phase of labour.  
52  
53 119 Specialist doctors and specialty trainees are only involved when complications arise.<sup>25</sup> In high-risk  
54  
55 120 deliveries, specialist doctors and specialty trainees are always involved, and managing the delivery  
56  
57  
58 121 is a collaborative team effort between the midwife, specialty trainee, and specialist doctor.  
59  
60

1  
2  
3  
4  
5  
6  
7  
8  
9  
10  
11  
12  
13  
14  
15  
16  
17  
18  
19  
20  
21  
22  
23  
24  
25  
26  
27  
28  
29  
30  
31  
32  
33  
34  
35  
36  
37  
38  
39  
40  
41  
42  
43  
44  
45  
46  
47  
48  
49  
50  
51  
52  
53  
54  
55  
56  
57  
58  
59  
60

122

## Population

### Eligible for inclusion

Midwives, specialty trainees, and specialist doctors in obstetrics and gynaecology working clinically in a Danish labour ward in 2018 were eligible.

#### *Midwives*

In Denmark midwives must earn a bachelor's degree in midwifery. During the 3.5-year programme students spend half of their time in clinical placements, e.g. midwifery centres, labour wards, antenatal wards and postnatal wards. Most midwives work in shifts. When caring for women giving birth, midwives are qualified and authorised to work independently, though in collaboration with a doctor when complications arise. This study collected data on midwives working predominantly on labour wards. All the midwives were included as if they were working full-time.

#### *Specialty trainees*

In this study, specialty trainee refers to doctors in their five-year postgraduate medical specialist training programme in obstetrics and gynaecology. Mandatory general courses, specialty-specific courses, and research training are also part of the curriculum. Upon graduation they are qualified to examine and treat 90% of the conditions in the specialty.<sup>26</sup>

#### *Specialist doctors*

In this study specialist doctors refers to individuals who have completed their specialty training in obstetrics and gynaecology. A relatively large proportion of specialist doctors are subspecialised in either obstetrics or gynaecology, however with both groups participating in night shifts on the labour

1  
2  
3  
4  
5  
6  
7  
8  
9  
10  
11  
12  
13  
14  
15  
16  
17  
18  
19  
20  
21  
22  
23  
24  
25  
26  
27  
28  
29  
30  
31  
32  
33  
34  
35  
36  
37  
38  
39  
40  
41  
42  
43  
44  
45  
46  
47  
48  
49  
50  
51  
52  
53  
54  
55  
56  
57  
58  
59  
60

wards. Specialist doctors on call have full responsibility for the labour ward and supervise specialty trainees. According to the Danish Health Association labour wards must, as a minimum, always have a specialist doctor or a last year specialty trainee on duty. We included only specialist doctors, working in hospitals, who also did night shifts on the labour wards.

The average work week for full-time healthcare professionals is 37 hours in Denmark. All healthcare professionals included in this study participated in obstetric night shifts.

## Data collection

### Healthcare professionals

Data on the number of obstetric healthcare professionals were collected in 2018 to obtain more valid data than would be possible had data been collected for previous years. Data on healthcare professionals were retrieved in various ways.

#### *Midwives*

The heads of midwifery in maternity units across Denmark were contacted by email in October 2018 and asked to provide data on the number of midwives employed in their labour wards.

#### *Specialty trainees*

Data on the number of specialty trainees was obtained through the Danish Health Authority, which regulates the number of specialty trainees.<sup>27, 28</sup>

#### *Specialist doctors*

1  
2  
3  
4 169 The Danish Society of Obstetricians and Gynaecologists furnished data on the number of specialist  
5  
6  
7 170 doctors.

8  
9 171  
10  
11 172 The data on the number of healthcare professionals working in labour wards were validated with data  
12  
13  
14 173 from a national quality assurance project called Safe Deliveries.<sup>29</sup>

### 15 16 174 17 18 175 **Obstetric events**

19  
20 176 In this study the term obstetric events refers to both obstetric emergencies and high-risk deliveries,  
21  
22  
23 177 the former defined as serious, unexpected, and potentially life-threatening conditions that may occur  
24  
25 178 in pregnancy, during labour, or after delivery, and which require immediate action by healthcare  
26  
27 179 professionals,<sup>2, 3</sup> while the latter involve actual or potential hazards to the health or well-being of the  
28  
29  
30 180 mother or foetus. The incidence of obstetric events used in this study was calculated based on data  
31  
32 181 from 465,919 deliveries from 2008–2015 and are reported in another paper.<sup>1</sup> Data were retrieved  
33  
34 182 from the Danish Medical Birth Registry, which was established in 1973 and contains information on  
35  
36  
37 183 all deliveries in Denmark, including data on the mother, child, pregnancy, and delivery.<sup>30</sup> Diagnoses  
38  
39 184 are registered using International Classification of Diseases codes (ICD), 10<sup>th</sup> revision<sup>31</sup> and surgery  
40  
41 185 is coded by the Danish version of the NOMESCO Classification of Surgical Procedures (NCSP).<sup>32</sup>  
42  
43 186 In Denmark, all individuals have a unique personal identification number, making it possible to  
44  
45  
46 187 conduct valid registry-based studies. Diagnoses in the Danish Medical Birth Registry have been  
47  
48 188 validated, and the authors found that the more severe the condition, the higher the validity of the  
49  
50 189 coding.<sup>33</sup>

51  
52  
53 190 The obstetric events included in our study were: Apgar score <7/5 min (ICD-10: DVA00-DVA06),  
54  
55 191 eclampsia (ICD-10: O151, O152, O159), emergency caesarean section (NCSP: KMCA10A,  
56  
57 192 KMCA10D, KMCA10E), severe postpartum haemorrhage ( $\geq 1000$  ml) (ICD-10: O072, only  $\geq 1000$   
58  
59  
60

1  
2  
3  
4 193 ml), shoulder dystocia (ICD-10: O660, NCSP: KMAH15), umbilical cord prolapse (ICD-10: O690),  
5  
6 194 vaginal breech delivery (NCSP: DUP07-DUP11, DUP16 without caesarean sections, NCSP:  
7  
8  
9 195 KMCA10), vaginal twin delivery (ICD-10: O300, without caesarean sections, NCSP: KMCA10), and  
10  
11 196 instrumental delivery by vacuum extraction (NCSP: KMAE00, KMAE03, KMAE96). These critical  
12  
13 197 events may result in maternal and neonatal mortality and morbidity, are often subjects of clinical  
14  
15  
16 198 training.<sup>4, 5, 7, 11, 15</sup> Moreover, obstetric healthcare professionals are expected to safely and expertly  
17  
18 199 manage these events.  
19

20 200

21 201

## 22 202 **Statistical analysis**

23  
24  
25 203 The outcome of interest was the estimated average time interval between the expected acquaintance  
26  
27 204 with one obstetric event to the next similar obstetric event divided across the number of midwives,  
28  
29  
30 205 specialty trainees, and specialist doctors. We calculated the average time interval between the events  
31  
32 206 by dividing the number of events per year (incidence times the total number of deliveries in 2018)  
33  
34 207 with the number of healthcare professionals in the study (midwives, specialty trainees, and specialist  
35  
36  
37 208 doctors, respectively). The result was divided by 12 to calculate the number of months between a  
38  
39 209 potentially experienced event. We based the analysis on the assumption that all healthcare  
40  
41 210 professionals can learn from an event if they are either participating hands-on or are present in the  
42  
43  
44 211 delivery room as an observer or assistant. We, therefore, assumed that one event had a midwife, a  
45  
46  
47 212 specialty trainee, and a specialist doctor involved. Statistically the three groups of healthcare  
48  
49  
50 213 professionals therefore share an event.  
51

52 214 Since the estimates constitute average numbers, they are presented as means. Probabilities of  
53  
54  
55 215 experiencing an obstetric emergency were calculated using Microsoft Excel (Microsoft Cooperation  
56  
57 216 version 14.6.6).  
58  
59  
60



1  
2  
3  
4 217  
5  
6  
7 218  
8  
9 219  
10  
11 220  
12  
13  
14 221  
15  
16 222  
17  
18 223  
19  
20 224  
21  
22  
23 225  
24  
25 226  
26  
27 227  
28  
29  
30 228  
31  
32 229  
33  
34 230  
35  
36  
37 231  
38  
39 232  
40  
41 233  
42  
43 234  
44  
45  
46 235  
47  
48 236  
49  
50 237  
51  
52  
53 238  
54  
55 239  
56  
57  
58  
59  
60

## **Patient or public involvement**

There was no direct patient or public involvement in this study.

## **Results**

Denmark had 61,273 deliveries in 2018.<sup>24</sup> Table 1 presents data on the number of midwives, specialty trainees, and specialist doctors working at one of the 21 hospital labour wards. The number of midwives per labour ward ranged from 13 to 135.

Table 2 shows the incidences of the obstetric events and the average time interval between experiencing each of the studied obstetric event as midwives, specialty trainees, and specialist doctors in obstetrics and gynaecology. These estimates were calculated under the assumption that all healthcare professionals learn from an event if they either participate hands-on, observe the event, or act as an assistant.

Six of the obstetric events (eclampsia, Apgar score <7/5 min, umbilical cord prolapse, singleton vaginal breech delivery, shoulder dystocia, and vaginal twin delivery) occurred at a low incidence of 0.05–1.00%. Three of the events (severe postpartum haemorrhage, delivery by vacuum extraction, and emergency caesarean section) occurred relatively often, with an incidence of 6.4–12.2%. The time interval between the events differed depending on the incidence of the event and the group of healthcare professionals. Midwives experienced eclampsia only every 42 years on average, specialty trainees every six years, and specialist doctors every 11 years.

1  
2  
3  
4  
5  
6  
7  
8  
9  
10  
11  
12  
13  
14  
15  
16  
17  
18  
19  
20  
21  
22  
23  
24  
25  
26  
27  
28  
29  
30  
31  
32  
33  
34  
35  
36  
37  
38  
39  
40  
41  
42  
43  
44  
45  
46  
47  
48  
49  
50  
51  
52  
53  
54  
55  
56  
57  
58  
59  
60

240 The events with relatively high incidence were hence experienced relatively more often. Emergency  
241 caesarean section, with an incidence of 12.2%, were experienced, on average, every other month for  
242 midwives, every nine days for specialty trainees, and every 17 days for specialist doctors.

243 Instrumental delivery with vacuum extraction and severe postpartum haemorrhage, with an incidence  
244 of 7.0% and 6.4%, respectively, were, on average, experienced by midwives every four months, by  
245 specialty trainees every 16 days, and by specialist doctors once a month (Table 2).

## 247 Discussion

### 248 *Main findings*

249 In this Danish national cross-sectional study examining how often an obstetric healthcare professional  
250 can expect to be involved in an obstetric emergency or a high-risk delivery, we found that the average  
251 time interval between experiencing one of the obstetric events ranged from days to years. Our results  
252 show that midwives experienced the studied events less frequently than specialist doctors, and  
253 specialty trainees were found to experience the events most frequently.

### 255 *Strengths and limitations*

256 This study addressed a gap in the research literature by trying to estimate how often healthcare  
257 professionals can expect to experience specific obstetric emergencies or high-risk deliveries in a  
258 Danish healthcare setting. A strength of our study is that the incidence of the obstetric events was  
259 based on a large data source comprising 465,919 deliveries during an eight-year period. The exact  
260 number of midwives was difficult to obtain due to diversity in work tasks and work hours. Therefore,  
261 we included midwives working both part- and full-time on labour wards, which suggests that our  
262 results are conservative estimates.

1  
2  
3  
4  
5  
6  
7  
8  
9  
10  
11  
12  
13  
14  
15  
16  
17  
18  
19  
20  
21  
22  
23  
24  
25  
26  
27  
28  
29  
30  
31  
32  
33  
34  
35  
36  
37  
38  
39  
40  
41  
42  
43  
44  
45  
46  
47  
48  
49  
50  
51  
52  
53  
54  
55  
56  
57  
58  
59  
60

263 Even though the number of healthcare professionals working on labour wards changes over time due  
264 to various organisational, political, and economic factors, our results are assumed to be the most valid  
265 estimates obtainable as minor variations in the numbers do not change the overall estimates  
266 substantially.

267 We used data on specific obstetric events from existing research, obtained for 2008–2015.<sup>1</sup> Data on  
268 the number of obstetric healthcare professionals were collected for 2018 since data from this year is  
269 assumed to be more valid compared to data for previous years due to the possibility of recall bias.  
270 Nationally, incidences of obstetric events are fairly consistent over the years. Therefore, we have no  
271 reason to believe that the different time periods used may have compromised the validity of our study  
272 results.<sup>1</sup>

273 Danish labour wards differ in size and level of specialisation. Consequently, healthcare professionals  
274 at large departments with a high level of specialisation will experience the events more often than  
275 healthcare professionals at smaller departments, and more frequently than our results suggest.  
276 Moreover, the time interval between attending the events may vary due to the variations in healthcare  
277 professionals' clinical preference as well as differences in regional clinical practice. Finally, data on  
278 incidences, e.g., vaginal breech deliveries, could be distributed unevenly between the labour wards  
279 due to different regional practices.

280 Our analysis assumed that the healthcare professionals may learn from a specific obstetric event if  
281 they are either providing care hands-on, are present in the delivery room either as an observer or as  
282 an assistant. However, if we base our findings on the assumption that each obstetric event only allow  
283 one from each healthcare worker profession, i.e., only one midwife, one specialty trainee, and one  
284 specialist doctor to learn from each event, then the frequency with which each of the attendants may  
285 potentially learn from these relative rare obstetric events fall significantly.

286

1  
2  
3  
4 287 *Interpretation*

5  
6 288 Our results suggest that midwives and specialist doctors can have a lifelong working life and only  
7  
8  
9 289 experience certain severe obstetric emergencies once or twice, if at all. When emergencies occur,  
10  
11 290 however, healthcare professionals are expected to have the skills to manage the event according to  
12  
13 291 well-known, evidence-based standards of obstetric care. As a result, healthcare professionals must  
14  
15  
16 292 always be prepared for obstetric emergencies to occur. Our findings show that it is unrealistic for  
17  
18 293 healthcare professionals to obtain and maintain the competences required to manage rare obstetric  
19  
20 294 events through clinical experience alone. Studies on trainee doctors' experience and confidence in  
21  
22  
23 295 managing vaginal breech deliveries and vaginal twin deliveries show that the confidence increased  
24  
25 296 with increasing number of deliveries attended.<sup>34, 35</sup> Further, among trainees who did not intend to  
26  
27 297 offer vaginal breech deliveries and vaginal twin deliveries, in 46% and 67%, the argument was that  
28  
29  
30 298 they did not have sufficient experience to manage these complex vaginal deliveries.<sup>35</sup>

31  
32 299 A common feature of the events studied was that the time interval between emergencies or high-risk  
33  
34 300 deliveries depended on the healthcare professional group, indicating that some groups can acquire  
35  
36 301 the skills based primarily on clinical experience alone. However, alternative educational pathways  
37  
38  
39 302 should be provided for other groups. To improve patient safety, minimise litigation, and ameliorate  
40  
41 303 the consequences for the healthcare professionals involved ensuring that they have the necessary  
42  
43 304 skills to manage obstetric events must be prioritised.<sup>22</sup>

44  
45 305 Educational approaches could be video-cases, E-learning, case-based interprofessional learning or  
46  
47  
48 306 simulation-based education.<sup>36</sup> Simulation-based education, which is a valuable supplement to  
49  
50 307 traditional ways of learning through clinical practices and mentorship, represent one way of ensuring  
51  
52  
53 308 acquisition of clinical skills and maintenance hereof.<sup>37</sup> Simulation-based training can identify and  
54  
55 309 correct common clinical errors made during emergencies, and has been recommended as a valuable  
56  
57 310 standard supplementary to clinical practice in order to improve care provided.<sup>23, 38, 39</sup> Obstetric  
58  
59  
60

1  
2  
3  
4 311 emergency simulation-based training has been shown to impact the knowledge, skills, and attitudes  
5  
6 312 of healthcare professionals. Moreover, some studies have found that this type of training reduces  
7  
8  
9 313 maternal and neonatal morbidity and mortality, though other studies have failed to show an effect on  
10  
11 314 clinical outcomes.<sup>40-44</sup>

12  
13 315 Knowledge and skills deteriorate over time and must be maintained.<sup>41, 45, 46</sup> Studies show that the  
14  
15 316 level of knowledge falls within 9–15 months after obstetric skills training,<sup>41, 44, 47</sup> and some studies  
16  
17  
18 317 suggest that annual obstetric skills training is necessary to combat this decline.<sup>45, 48</sup> Our findings allow  
19  
20 318 us to differentiate between the obstetric events that require frequent simulation based training and the  
21  
22  
23 319 ones that can generally be maintained at a certain level based on daily clinical practice alone.  
24  
25 320 Moreover, our results may indicate which healthcare professionals can rely on maintaining their skills  
26  
27 321 primarily through clinical practice and who needs additional obstetric skills training. However, some  
28  
29  
30 322 argue that training individual groups of healthcare professionals is inadequate, highlighting the  
31  
32 323 importance of including all team members in a multidisciplinary team when training due to the  
33  
34 324 complexity of the skills and the rarity of certain obstetric events.<sup>41, 49</sup>

35  
36 325 Our results may be relevant in other clinical specialties in which rare clinical emergencies occur that  
37  
38  
39 326 require prompt and professional action by healthcare professionals, e.g., abdominal aortic aneurysms  
40  
41 327 in vascular surgery<sup>50</sup> and paediatric emergency medicine.<sup>51</sup> Rare events in these medical specialties  
42  
43 328 also represent a challenge in terms of learning the required skills via the traditional apprenticeship  
44  
45  
46 329 model and ongoing clinical work, which is why simulation-based skills training is necessary.<sup>52</sup>

47  
48 330 Finally, the results from this study only provide a part of the overall picture of training and  
49  
50 331 maintaining the competences in managing rare complications.

## 51 52 53 332 54 55 333 **Conclusion**

1  
2  
3  
4 334 We found that some obstetric emergencies and high-risk deliveries were experienced so infrequently  
5  
6 335 that the clinical skills required to competently manage the events is deemed to be impossible to obtain  
7  
8  
9 336 and maintain in clinical practice alone. Consequently, to enhance patient safety, reduce burnout in  
10  
11 337 healthcare professionals, and minimise litigation costs, investing in supplementary training activities  
12  
13 338 is the way forward to improving patient care. In this regard, our study contributes to assessing the  
14  
15  
16 339 need for supplementary educational initiatives.

17  
18 340  
19

## 20 341 **Acknowledgments**

22  
23 342 We would like to thank the heads of midwifery from all maternity units in Denmark for providing us  
24  
25 343 with data on the number of midwives employed in their units. We would like to express our deepest  
26  
27 344 gratitude to senior advisor Steen Rasmussen, MSc, MPH, Rigshospitalet for managing the national  
28  
29 345 registry data from the Danish Medical Birth Registry.

30  
31  
32 346  
33

## 34 347 **Contributorship statement**

36  
37 348 JLS created the idea. SH, LT, TB, ALR, MJ, and JLS participated in creating the study design. SH  
38  
39 349 was responsible for collecting the data. SH and LT performed the analysis and drafted the initial  
40  
41 350 manuscript. TB, ALR, MJ, and JLS reviewed and revised the manuscript for interpretation of data  
42  
43 351 and critical revision of important intellectual content. All authors reviewed and approved the final  
44  
45  
46 352 manuscript as submitted.

47  
48 353  
49

## 50 354 **Details of ethics approval**

52  
53 355 Approval was obtained from the Danish Data Protection Agency (file no.: 2012-58-0004). As this is  
54  
55 356 a registry-based study it is not legally required to obtain ethics approval from the Danish National  
56  
57 357 Research Ethics Committee.

58  
59  
60

## 358 Disclosure of interest

359 The authors have no conflicts of interests to disclose.

## 361 Funding

362 This work was supported by TrygFonden, grant number 105632.

## 364 Data sharing statement

365 The data that support the findings of this study are available on request from the corresponding author,  
366 (SH).

## 368 References

- 369 1. Hoegh S, Thellesen L, Christensen KB, et al. Incidences of obstetric outcomes and  
370 sample size calculations: A Danish national registry study based on all deliveries from 2008 to  
371 2015. *Acta Obstet Gynecol Scand* 2019; 2019/08/02. DOI: 10.1111/aogs.13700.
- 372 2. ACOG Committee. Committee opinion no. 590: preparing for clinical emergencies  
373 in obstetrics and gynecology. *Obstet Gynecol* 2014; 123: 722-725. DOI:  
374 10.1097/01.AOG.0000444442.04111.c6.
- 375 3. Oxford Dictionaries. <https://en.oxforddictionaries.com> (2018, accessed October  
376 18 2018).
- 377 4. Khan KS, Wojdyla D, Say L, et al. WHO analysis of causes of maternal death: a  
378 systematic review. *The Lancet* 2006; 367: 1066-1074.
- 379 5. Cantwell R, Clutton-Brock T, Cooper G, et al. Saving Mothers' Lives: Reviewing  
380 maternal deaths to make motherhood safer: 2006-2008. The Eighth Report of the Confidential  
381 Enquiries into Maternal Deaths in the United Kingdom. *BJOG* 2011; 118 Suppl 1: 1-203. DOI:  
382 10.1111/j.1471-0528.2010.02847.x.
- 383 6. Ozimek JA, Eddins RM, Greene N, et al. Opportunities for improvement in care  
384 among women with severe maternal morbidity. *Am J Obstet Gynecol* 2016; 215: 509 e501-506.  
385 DOI: 10.1016/j.ajog.2016.05.022.
- 386 7. Berglund S, Grunewald C, Pettersson H, et al. Risk factors for asphyxia associated  
387 with substandard care during labor. *Acta Obstet Gynecol Scand* 2010; 89: 39-48. DOI:  
388 10.3109/00016340903418751.
- 389 8. Milsom I, Ladfors L, Thiringer K, et al. Influence of maternal, obstetric and fetal risk  
390 factors on the prevalence of birth asphyxia at term in a Swedish urban population. *Acta Obstet*  
391 *Gynecol Scand* 2002; 81: 909-917.

1  
2  
3  
4  
5  
6  
7  
8  
9  
10  
11  
12  
13  
14  
15  
16  
17  
18  
19  
20  
21  
22  
23  
24  
25  
26  
27  
28  
29  
30  
31  
32  
33  
34  
35  
36  
37  
38  
39  
40  
41  
42  
43  
44  
45  
46  
47  
48  
49  
50  
51  
52  
53  
54  
55  
56  
57  
58  
59  
60

9. Hannah ME, Hannah WJ, Hewson SA, et al. Planned caesarean section versus planned vaginal birth for breech presentation at term: a randomised multicentre trial. Term Breech Trial Collaborative Group. *Lancet* 2000; 356: 1375-1383.
10. Barrett JF, Hannah ME, Hutton EK, et al. A randomized trial of planned cesarean or vaginal delivery for twin pregnancy. *N Engl J Med* 2013; 369: 1295-1305. 2013/10/04. DOI: 10.1056/NEJMoa1214939.
11. Hove LD, Bock J, Christoffersen JK, et al. Analysis of 127 peripartum hypoxic brain injuries from closed claims registered by the Danish Patient Insurance Association. *Acta Obstet Gynecol Scand* 2008; 87: 72-75. DOI: 10.1080/00016340701797567.
12. Berglund S, Pettersson H, Cnattingius S, et al. How often is a low Apgar score the result of substandard care during labour? *BJOG* 2010; 117: 968-978. DOI: 10.1111/j.1471-0528.2010.02565.x.
13. MBRRACE-UK. *MBRRACE-UK 2017 Perinatal Confidential Enquiry: Term, singleton, intrapartum stillbirth and intrapartum-related neonatal death*. . 2017. Leicester: The Infant Mortality and Morbidity Studies, Department of Health Sciences, University of Leicester:.
14. MBRRACE-UK. *Saving Lives, Improving Mothers' Care - Lessons learned to inform maternity care from the UK and Ireland Confidential Enquiries into Maternal Deaths and Morbidity 2013-15*. 2017. Oxford: National Perinatal Epidemiology Unit, University of Oxford.
15. Berglund S, Grunewald C, Pettersson H, et al. Severe asphyxia due to delivery-related malpractice in Sweden 1990-2005. *BJOG* 2008; 115: 316-323. DOI: 10.1111/j.1471-0528.2007.01602.x.
16. Knight M, Bunch K, Tuffnell D, et al. *Saving Lives, Improving Mothers' Care. Lessons learned to inform maternity care from the UK and Ireland Confidential Enquiries into Maternal Deaths and Morbidity 2015-17*. 2019. Oxford: National Perinatal Epidemiology Unit, University of Oxford.
17. Seys D, Wu AW, Van Gerven E, et al. Health care professionals as second victims after adverse events: a systematic review. *Eval Health Prof* 2013; 36: 135-162. 2012/09/15. DOI: 10.1177/0163278712458918.
18. Wahlberg A, Andreen Sachs M, Johannesson K, et al. Post-traumatic stress symptoms in Swedish obstetricians and midwives after severe obstetric events: a cross-sectional retrospective survey. *BJOG* 2017; 124: 1264-1271. 2016/08/27. DOI: 10.1111/1471-0528.14259.
19. Robertson JH and Thomson AM. An exploration of the effects of clinical negligence litigation on the practice of midwives in England: A phenomenological study. *Midwifery* 2016; 33: 55-63. 2015/11/04. DOI: 10.1016/j.midw.2015.10.005.
20. Bourne T, Vanderhaegen J, Vranken R, et al. Doctors' experiences and their perception of the most stressful aspects of complaints processes in the UK: an analysis of qualitative survey data. *BMJ Open* 2016; 6: e011711. 2016/07/06. DOI: 10.1136/bmjopen-2016-011711.
21. Wu AW. Medical error: the second victim. The doctor who makes the mistake needs help too. *BMJ* 2000; 320: 726-727. 2000/03/17. DOI: 10.1136/bmj.320.7237.726.
22. Yau CWH, Leigh B, Liberati E, et al. Clinical negligence costs: taking action to safeguard NHS sustainability. *BMJ* 2020; 368: m552. 2020/03/04. DOI: 10.1136/bmj.m552.
23. NHS Litigation Authority. *Ten years of maternity claims. An analysis of nhs litigation authority data*. 2012. London: NHS LA.



- 1  
2  
3  
4 439 24. National Health Data Authority. Medicinsk Fødselsregister,  
5 440 [https://sundhedsdatastyrelsen.dk/da/registre-og-services/om-de-nationale-](https://sundhedsdatastyrelsen.dk/da/registre-og-services/om-de-nationale-sundhedsregistre/graviditet-foedsler-og-boern/foedselsregisteret)  
6 441 [sundhedsregistre/graviditet-foedsler-og-boern/foedselsregisteret](https://sundhedsregistre/graviditet-foedsler-og-boern/foedselsregisteret) (accessed 11 April 2018).  
7 442 25. Sundhedsstyrelsen. *Anbefalinger for svangreomsorgen*. 2013. Copenhagen.  
8 443 26. National Board of Health. *Postgraduate medical training in Denmark – status and*  
9 444 *future perspectives. Summary in English*. 2012. Copenhagen: National Board of Health.  
10 445 27. Danish Health Authority. *Lægeprognose 2015-2040 Udbuddet af læger og*  
11 446 *speciallæger*. 2016. Copenhagen: Sundhedsstyrelsen.  
12 447 28. Danish Health Authority. *Opplåede og besatte hoveduddannelsesforløb i 2016*.  
13 448 2017. Copenhagen.  
14 449 29. Thellesen L, Sorensen JL, Hedegaard M, et al. Cardiocography interpretation  
15 450 skills and the association with size of maternity unit, years of obstetric work experience and  
16 451 healthcare professional background: a national cross-sectional study. *Acta Obstet Gynecol Scand*  
17 452 2017; 96: 1075-1083. DOI: 10.1111/aogs.13171.  
18 453 30. Langhoff-Roos J, Krebs L, Klungsoyr K, et al. The Nordic medical birth registers--a  
19 454 potential goldmine for clinical research. *Acta Obstet Gynecol Scand* 2014; 93: 132-137.  
20 455 31. World Health Organization. *International Classification of Diseases and Related*  
21 456 *Health Problems*. 2016.  
22 457 32. Nordic Centre for Classification in Healthcare. NOMESCO Classification of Surgical  
23 458 Procedures (NSCP), <https://medinfo.dk/sks/brows.php> (2012, Version 1.16).  
24 459 33. Bliddal M, Broe A, Pottgard A, et al. The Danish Medical Birth Register. *Eur J*  
25 460 *Epidemiol* 2018; 33: 27-36. 2018/01/20. DOI: 10.1007/s10654-018-0356-1.  
26 461 34. Chinnock M and Robson S. Obstetric trainees' experience in vaginal breech  
27 462 delivery: implications for future practice. *Obstet Gynecol* 2007; 110: 900-903. 2007/10/02. DOI:  
28 463 10.1097/01.AOG.0000267199.32847.c4.  
29 464 35. Yeoh SGJ, Rolnik DL, Regan JA, et al. Experience and confidence in vaginal breech  
30 465 and twin deliveries among obstetric trainees and new specialists in Australia and New Zealand.  
31 466 *Aust N Z J Obstet Gynaecol* 2019; 59: 545-549. 2018/12/20. DOI: 10.1111/ajo.12931.  
32 467 36. Topperzer MK, Roug LI, Andres-Jensen L, et al. Twelve tips for postgraduate  
33 468 interprofessional case-based learning. *Med Teach* 2021: 1-14. 2021/03/25. DOI:  
34 469 10.1080/0142159X.2021.1896691.  
35 470 37. Cook DA, Hatala R, Brydges R, et al. Technology-enhanced simulation for health  
36 471 professions education: a systematic review and meta-analysis. *JAMA* 2011; 306: 978-988.  
37 472 2011/09/09. DOI: 10.1001/jama.2011.1234.  
38 473 38. and ACoO and Gynecologists. Committee opinion no. 590: preparing for clinical  
39 474 emergencies in obstetrics and gynecology. *Obstet Gynecol* 2014; 123: 722-725. 2014/02/21.  
40 475 DOI: 10.1097/01.AOG.0000444442.04111.c6.  
41 476 39. Gardner R and Raemer DB. Simulation in obstetrics and gynecology. *Obstet Gynecol*  
42 477 *Clin North Am* 2008; 35: 97-127, ix. 2008/03/06. DOI: 10.1016/j.ogc.2007.12.008.  
43 478 40. Bergh AM, Baloyi S and Pattinson RC. What is the impact of multi-professional  
44 479 emergency obstetric and neonatal care training? *Best Pract Res Clin Obstet Gynaecol* 2015; 29:  
45 480 1028-1043. DOI: 10.1016/j.bpobgyn.2015.03.017.  
46 481 41. Merien AE, van de Ven J, Mol BW, et al. Multidisciplinary team training in a  
47 482 simulation setting for acute obstetric emergencies: a systematic review. *Obstet Gynecol* 2010;  
48 483 115: 1021-1031. DOI: 10.1097/AOG.0b013e3181d9f4cd.  
49  
50  
51  
52  
53  
54  
55  
56  
57  
58  
59  
60

1  
2  
3  
4  
5  
6  
7  
8  
9  
10  
11  
12  
13  
14  
15  
16  
17  
18  
19  
20  
21  
22  
23  
24  
25  
26  
27  
28  
29  
30  
31  
32  
33  
34  
35  
36  
37  
38  
39  
40  
41  
42  
43  
44  
45  
46  
47  
48  
49  
50  
51  
52  
53  
54  
55  
56  
57  
58  
59  
60

42. Draycott T, Sibanda T, Owen L, et al. Does training in obstetric emergencies improve neonatal outcome? *BJOG* 2006; 113: 177-182. 2006/01/18. DOI: 10.1111/j.1471-0528.2006.00800.x.
43. Lenguerrand E, Winter C, Siassakos D, et al. Effect of hands-on interprofessional simulation training for local emergencies in Scotland: the THISTLE stepped-wedge design randomised controlled trial. *BMJ Qual Saf* 2020; 29: 122-134. 2019/07/16. DOI: 10.1136/bmjqs-2018-008625.
44. Sorensen JL, Lokkegaard E, Johansen M, et al. The implementation and evaluation of a mandatory multi-professional obstetric skills training program. *Acta Obstet Gynecol Scand* 2009; 88: 1107-1117. DOI: 10.1080/00016340903176834.
45. Crofts JF, Fox R, Draycott TJ, et al. Retention of factual knowledge after practical training for intrapartum emergencies. *Int J Gynaecol Obstet* 2013; 123: 81-85. DOI: 10.1016/j.ijgo.2013.04.015.
46. Crofts JF, Bartlett C, Ellis D, et al. Management of shoulder dystocia: skill retention 6 and 12 months after training. *Obstet Gynecol* 2007; 110: 1069-1074. 2007/11/06. DOI: 10.1097/01.AOG.0000286779.41037.38.
47. Nelissen E, Ersdal H, Mduma E, et al. Helping Mothers Survive Bleeding After Birth: retention of knowledge, skills, and confidence nine months after obstetric simulation-based training. *BMC Pregnancy Childbirth* 2015; 15: 190. 2015/08/26. DOI: 10.1186/s12884-015-0612-2.
48. Draycott TJ, Collins KJ, Crofts JF, et al. Myths and realities of training in obstetric emergencies. *Best Pract Res Clin Obstet Gynaecol* 2015; 29: 1067-1076. 2015/08/10. DOI: 10.1016/j.bpobgyn.2015.07.003.
49. Siassakos D, Fox R, Bristowe K, et al. What makes maternity teams effective and safe? Lessons from a series of research on teamwork, leadership and team training. *Acta Obstet Gynecol Scand* 2013; 92: 1239-1243. 2013/08/29. DOI: 10.1111/aogs.12248.
50. Lilja F, Mani K and Wanhainen A. Editor's Choice - Trend-break in Abdominal Aortic Aneurysm Repair With Decreasing Surgical Workload. *Eur J Vasc Endovasc Surg* 2017; 53: 811-819. 2017/04/11. DOI: 10.1016/j.ejvs.2017.02.031.
51. Meyer L, Stubbs B, Fahrenbruch C, et al. Incidence, causes, and survival trends from cardiovascular-related sudden cardiac arrest in children and young adults 0 to 35 years of age: a 30-year review. *Circulation* 2012; 126: 1363-1372. 2012/08/14. DOI: 10.1161/CIRCULATIONAHA.111.076810.
52. Nayahangan LJ, Lawaetz J, Strom M, et al. Ensuring Competency in Open Aortic Aneurysm Repair - Development and Validation of a New Assessment Tool. *Eur J Vasc Endovasc Surg* 2020; 59: 767-774. 2020/02/25. DOI: 10.1016/j.ejvs.2020.01.021.

1  
2  
3  
4 522 **Table Caption List**

6 523 **Table 1.** Number of obstetric healthcare professionals working in Danish labour wards in 2018

8  
9 524 **Table 2.** Estimated time between obstetric emergency or high-risk delivery divided across midwives,  
10  
11 525 specialty trainees, and doctors specialised in obstetrics and gynaecology.

12  
13  
14 526

15  
16  
17  
18  
19  
20  
21  
22  
23  
24  
25  
26  
27  
28  
29  
30  
31  
32  
33  
34  
35  
36  
37  
38  
39  
40  
41  
42  
43  
44  
45  
46  
47  
48  
49  
50  
51  
52  
53  
54  
55  
56  
57  
58  
59  
60

For peer review only

1  
2  
3  
4  
5  
6  
7  
8  
9  
10  
11  
12  
13  
14  
15  
16  
17  
18  
19  
20  
21  
22  
23  
24  
25  
26  
27  
28  
29  
30  
31  
32  
33  
34  
35  
36  
37  
38  
39  
40  
41  
42  
43  
44  
45  
46  
47  
48  
49  
50  
51  
52  
53  
54  
55  
56  
57  
58  
59  
60527  
528**Table 1.** Approximate numbers of obstetric healthcare professionals working in one of the 21 Danish hospital labour wards in 2018.

| <b>Obstetric healthcare professionals</b>        | <b>Number of healthcare professionals</b> |
|--------------------------------------------------|-------------------------------------------|
| Midwives                                         | 1303                                      |
| Specialty trainees in obstetrics and gynaecology | 179                                       |
| Doctors specialised obstetrics and gynaecology   | 343                                       |

529  
530  
531

For peer review only

**Table 2.** Estimated time between obstetric emergency or high-risk delivery divided across midwives, specialty trainees, and doctors specialised in obstetrics and gynaecology

| Obstetric events <sup>a,b</sup>   | Incidence (%) | Expected time between obstetric events <sup>c</sup> divided across healthcare professionals |                    |                    |
|-----------------------------------|---------------|---------------------------------------------------------------------------------------------|--------------------|--------------------|
|                                   |               | Midwives                                                                                    | Specialty trainees | Specialist doctors |
| Eclampsia                         | 0.05          | 42 years                                                                                    | 6 years            | 11 years           |
| Umbilical cord prolapse           | 0.10          | 21 years                                                                                    | 3 years            | 5.5 years          |
| Singleton vaginal breech delivery | 0.50          | 4 years                                                                                     | 7 months           | 1 year             |
| Apgar score <7/5 min.             | 0.90          | 2.5 years                                                                                   | 4 months           | 8 months           |
| Shoulder dystocia                 | 1.00          | 2 years                                                                                     | 4 months           | 7 months           |
| Vaginal twin delivery             | 1.00          | 2 years                                                                                     | 4 months           | 7 months           |
| Severe postpartum haemorrhage     | 6.40          | 4 months                                                                                    | 17 days            | 1 month            |
| Vacuum extraction                 | 7.00          | 4 months                                                                                    | 15 days            | 1 month            |
| Emergency caesarean section       | 12.20         | 2 months                                                                                    | 9 days             | 16 days            |

Calculations based on the assumption that all healthcare professionals can learn from an event if they participate hands-on, observe or assist at the event.

<sup>a</sup> One delivery can be represented more than once at the obstetric events.

<sup>b</sup> The obstetric event incidence is based on deliveries in Denmark from 2008–2015, with gestational age 20+0 to 45+0. In the event of multiple foetuses in one pregnancy, an event among one or more newborns counts.

<sup>c</sup> Number of events per year are calculated based on number of deliveries in Denmark in 2018 (61 273 deliveries). Numbers are rounded up or down to nearest 0.5 years or months.

**STROBE 2007 (v4) Statement—Checklist of items that should be included in reports of *cross-sectional studies***

| Section/Topic                | Item # | Recommendation                                                                                                                                                                       | Reported on page # |
|------------------------------|--------|--------------------------------------------------------------------------------------------------------------------------------------------------------------------------------------|--------------------|
| <b>Title and abstract</b>    | 1      | (a) Indicate the study’s design with a commonly used term in the title or the abstract                                                                                               | 1                  |
|                              |        | (b) Provide in the abstract an informative and balanced summary of what was done and what was found                                                                                  | 2                  |
| <b>Introduction</b>          |        |                                                                                                                                                                                      |                    |
| Background/rationale         | 2      | Explain the scientific background and rationale for the investigation being reported                                                                                                 | 5                  |
| Objectives                   | 3      | State specific objectives, including any prespecified hypotheses                                                                                                                     | 6                  |
| <b>Methods</b>               |        |                                                                                                                                                                                      |                    |
| Study design                 | 4      | Present key elements of study design early in the paper                                                                                                                              | 6                  |
| Setting                      | 5      | Describe the setting, locations, and relevant dates, including periods of recruitment, exposure, follow-up, and data collection                                                      | 6-10               |
| Participants                 | 6      | (a) Give the eligibility criteria, and the sources and methods of selection of participants                                                                                          | 6                  |
| Variables                    | 7      | Clearly define all outcomes, exposures, predictors, potential confounders, and effect modifiers. Give diagnostic criteria, if applicable                                             | 10                 |
| Data sources/<br>measurement | 8*     | For each variable of interest, give sources of data and details of methods of assessment (measurement). Describe comparability of assessment methods if there is more than one group | 10                 |
| Bias                         | 9      | Describe any efforts to address potential sources of bias                                                                                                                            | 9                  |
| Study size                   | 10     | Explain how the study size was arrived at                                                                                                                                            | 7-8                |
| Quantitative variables       | 11     | Explain how quantitative variables were handled in the analyses. If applicable, describe which groupings were chosen and why                                                         | 10                 |
| Statistical methods          | 12     | (a) Describe all statistical methods, including those used to control for confounding                                                                                                | 10-11              |
|                              |        | (b) Describe any methods used to examine subgroups and interactions                                                                                                                  | 10-11              |
|                              |        | (c) Explain how missing data were addressed                                                                                                                                          | N/A                |
|                              |        | (d) If applicable, describe analytical methods taking account of sampling strategy                                                                                                   | N/A                |
|                              |        | (e) Describe any sensitivity analyses                                                                                                                                                | N/A                |
| <b>Results</b>               |        |                                                                                                                                                                                      |                    |

|                          |     |                                                                                                                                                                                                              |       |
|--------------------------|-----|--------------------------------------------------------------------------------------------------------------------------------------------------------------------------------------------------------------|-------|
| Participants             | 13* | (a) Report numbers of individuals at each stage of study—eg numbers potentially eligible, examined for eligibility, confirmed eligible, included in the study, completing follow-up, and analysed            | 11    |
|                          |     | (b) Give reasons for non-participation at each stage                                                                                                                                                         | N/A   |
|                          |     | (c) Consider use of a flow diagram                                                                                                                                                                           | N/A   |
| Descriptive data         | 14* | (a) Give characteristics of study participants (eg demographic, clinical, social) and information on exposures and potential confounders                                                                     | N/A   |
|                          |     | (b) Indicate number of participants with missing data for each variable of interest                                                                                                                          | N/A   |
| Outcome data             | 15* | Report numbers of outcome events or summary measures                                                                                                                                                         | 11-12 |
| Main results             | 16  | (a) Give unadjusted estimates and, if applicable, confounder-adjusted estimates and their precision (eg, 95% confidence interval). Make clear which confounders were adjusted for and why they were included | N/A   |
|                          |     | (b) Report category boundaries when continuous variables were categorized                                                                                                                                    | N/A   |
|                          |     | (c) If relevant, consider translating estimates of relative risk into absolute risk for a meaningful time period                                                                                             | N/A   |
| Other analyses           | 17  | Report other analyses done—eg analyses of subgroups and interactions, and sensitivity analyses                                                                                                               | 12    |
| <b>Discussion</b>        |     |                                                                                                                                                                                                              |       |
| Key results              | 18  | Summarise key results with reference to study objectives                                                                                                                                                     | 12    |
| Limitations              | 19  | Discuss limitations of the study, taking into account sources of potential bias or imprecision. Discuss both direction and magnitude of any potential bias                                                   | 13-14 |
| Interpretation           | 20  | Give a cautious overall interpretation of results considering objectives, limitations, multiplicity of analyses, results from similar studies, and other relevant evidence                                   | 14-15 |
| Generalisability         | 21  | Discuss the generalisability (external validity) of the study results                                                                                                                                        | 15    |
| <b>Other information</b> |     |                                                                                                                                                                                                              |       |
| Funding                  | 22  | Give the source of funding and the role of the funders for the present study and, if applicable, for the original study on which the present article is based                                                | 3     |

\*Give information separately for cases and controls in case-control studies and, if applicable, for exposed and unexposed groups in cohort and cross-sectional studies.

**Note:** An Explanation and Elaboration article discusses each checklist item and gives methodological background and published examples of transparent reporting. The STROBE checklist is best used in conjunction with this article (freely available on the Web sites of PLoS Medicine at <http://www.plosmedicine.org/>, Annals of Internal Medicine at <http://www.annals.org/>, and Epidemiology at <http://www.epidem.com/>). Information on the STROBE Initiative is available at [www.strobe-statement.org](http://www.strobe-statement.org).
